# Supplementary material for: Methods used to select results to include in meta-analyses of nutrition research: a meta-research study
Source: bioRxiv or medRxiv preprint supplement (doi:10.1101/2021.08.05.21261680), 2021-08-07
Supplement: Supplementary file [file media-1.pdf]

## Supplementary files

**Table S1. Modifications from the ROBUST study protocol**

| <b>Original plan</b>                                                                                                                                                                                                                                                                                                                                                                                                                                    | <b>Revised plan</b>                                                                                                                                                                                                                                                                                                                                                                                                                                                                                    | <b>Reason for modification</b>                                                                                                                                                                                                                                                                                                                                                                                                                                                                                                                                                                                                                                                                                                                                                                                                                                                                                                                                                                                                                                                                                                                                                                  |
|---------------------------------------------------------------------------------------------------------------------------------------------------------------------------------------------------------------------------------------------------------------------------------------------------------------------------------------------------------------------------------------------------------------------------------------------------------|--------------------------------------------------------------------------------------------------------------------------------------------------------------------------------------------------------------------------------------------------------------------------------------------------------------------------------------------------------------------------------------------------------------------------------------------------------------------------------------------------------|-------------------------------------------------------------------------------------------------------------------------------------------------------------------------------------------------------------------------------------------------------------------------------------------------------------------------------------------------------------------------------------------------------------------------------------------------------------------------------------------------------------------------------------------------------------------------------------------------------------------------------------------------------------------------------------------------------------------------------------------------------------------------------------------------------------------------------------------------------------------------------------------------------------------------------------------------------------------------------------------------------------------------------------------------------------------------------------------------------------------------------------------------------------------------------------------------|
| <p>We will seek a sample of SRs with meta-analysis meeting the following criteria:</p> <ul style="list-style-type: none"><li>• includes studies of people of any ages (i.e. infants, children, adolescents, adults or elderly people) and backgrounds in the generally healthy population, including pregnant and breastfeeding women and people with common diet-related risk factors such as being overweight or having high blood pressure</li></ul> | <p>We will seek a sample of SRs with meta-analysis meeting the following criteria:</p> <ul style="list-style-type: none"><li>• includes studies that enrolled (a) people of any age or background who were generally healthy, (b) a mixture of generally healthy people and people with diet-related risk factors (e.g. overweight, high blood pressure) or a particular health condition (e.g. type II diabetes or cardiovascular disease), or (c) people with non-specified health status;</li></ul> | <p>During screening of full text articles, we discovered that many otherwise eligible SRs did not state the health status of participants in included studies, or included a mix of participants who were healthy or those who had a particular clinical condition. After screening 1,500 abstracts and retrieving 149 full text articles, 44 SRs were considered to meet the eligibility criteria; however, on closer inspection, only 7 SRs included studies restricted to “healthy people”, 12 SRs included a mixture of studies of healthy people and people with a health condition (e.g. type II diabetes), and in 25 SRs the health status of participants was not clear (e.g. the authors said they included studies of “adults” and the characteristics of included studies presented provided no information on health status or risk factors). We have no reason to believe that SRs meeting the original inclusion criteria would be systematically different from SRs meeting the revised criteria. Therefore, rather than continue screening abstracts meeting the more stringent, original criteria, we decided to include SRs meeting the less stringent, revised criteria.</p> |

| Original plan                                                                                                                                                                                                                                                                                                    | Revised plan                                                                                                                                                                                                                                                                                                                                                                 | Reason for modification                                                                                                                                                                                                                                                                                                          |
|------------------------------------------------------------------------------------------------------------------------------------------------------------------------------------------------------------------------------------------------------------------------------------------------------------------|------------------------------------------------------------------------------------------------------------------------------------------------------------------------------------------------------------------------------------------------------------------------------------------------------------------------------------------------------------------------------|----------------------------------------------------------------------------------------------------------------------------------------------------------------------------------------------------------------------------------------------------------------------------------------------------------------------------------|
| <p>We will include meta-analyses of binary outcomes and meta-analyses of continuous outcomes.</p>                                                                                                                                                                                                                | <p>We will include meta-analyses of non-continuous outcomes (e.g. binary, count, time-to-event) and meta-analyses of continuous outcomes.</p>                                                                                                                                                                                                                                | <p>During screening of articles we decided to expand eligibility from meta-analyses of “binary” to meta-analyses of “non-continuous” outcomes given the types of multiplicity affecting these meta-analyses are similar.</p>                                                                                                     |
| <p>No plan for dealing with the scenario whereby screening of full text articles results in more than 25 SRs of one type (with binary or continuous outcomes).</p>                                                                                                                                               | <p>If, during the screening process the total number of eligible SRs identified exceeded the target of 25 SRs with a meta-analysis of a non-continuous outcome and 25 SRs with a meta-analysis of a continuous outcome, we will randomly sample 25 SRs of each type.</p>                                                                                                     | <p>By the time we had identified 25 eligible systematic reviews with meta-analysis of a continuous outcome, we had identified 74 eligible SRs with meta-analysis of a non-continuous outcome. Rather than include all SRs with meta-analysis of a non-continuous outcome in the study, we decided to randomly select 25 SRs.</p> |
| <p>Following piloting, two investigators will independently collect data from all remaining index meta-analyses and included studies.</p>                                                                                                                                                                        | <p>Following piloting, two investigators will independently collect data on half of the remaining index meta-analyses and their included studies, while one investigator will collect data on the other half of the remaining index meta-analyses and their included studies. We will randomly select the SRs which will have their data collected by two investigators.</p> | <p>We decided to reduce the workload for investigators responsible for collecting data.</p>                                                                                                                                                                                                                                      |
| <p>We will select a random sample of 50 SRs. From each SR, one investigator will select one meta-analysis of a binary or continuous outcome for assessment, stratifying the selection so that the final sample includes 25 binary and 25 continuous outcome meta-analyses. We will extract data from all SRs</p> | <p>We will select a random sample of 50 SRs, 25 of which will have a non-continuous index meta-analysis and 25 of which will have a continuous index meta-analysis. However, we will only extract data from SRs with less than 20 studies included in the index meta-analysis.</p>                                                                                           | <p>We decided to reduce the workload for investigators responsible for collecting data.</p>                                                                                                                                                                                                                                      |

| <b>Original plan</b>                                                                                                                                        | <b>Revised plan</b>                                                                                                                                                                                                                                                                                                                                                                                                                                                                                                                                                                                                                                                                                                                                                                                                                                                                                                                     | <b>Reason for modification</b>                                                                                                                                                                                                                                                                                                  |
|-------------------------------------------------------------------------------------------------------------------------------------------------------------|-----------------------------------------------------------------------------------------------------------------------------------------------------------------------------------------------------------------------------------------------------------------------------------------------------------------------------------------------------------------------------------------------------------------------------------------------------------------------------------------------------------------------------------------------------------------------------------------------------------------------------------------------------------------------------------------------------------------------------------------------------------------------------------------------------------------------------------------------------------------------------------------------------------------------------------------|---------------------------------------------------------------------------------------------------------------------------------------------------------------------------------------------------------------------------------------------------------------------------------------------------------------------------------|
| <p>selected, regardless of the number of included studies in the index meta-analysis.</p> <p>No plan for handling subgroup effect estimates in studies.</p> | <p>We will only extract subgroup effect estimates from studies if (a) they were the most compatible with the index meta-analysis (e.g. if the index meta-analysis is defined as “cancer mortality in women”, we will only extract subgroup estimates of cancer mortality for women); (b) they were the only effect estimates available in a paper and both were compatible with the index meta-analysis (e.g. if the index meta-analysis is defined as “cancer mortality” and study investigators report an estimate for men and an estimate for women, but not the combined estimate, we will extract both subgroup estimates); or (c) the systematic reviewers included subgroup effect estimates in the index meta-analysis.</p> <p>We will not extract subgroup effect estimates from studies if none of the 3 criteria above are met, and if an estimate based on the total sample of participants was available in the paper.</p> | <p>Subgroup effect estimates are less precise and less generalisable than effect estimates based on the total sample. For this reason, selecting an effect estimate based on the total sample (when available) ahead of the subgroup effect estimates should not be considered selective inclusion of results by reviewers.</p> |

## Supplement 2:

### Search Strategies

#### PubMed search

1. Nutritional Sciences[mh] OR Nutritional Physiological Phenomena[mh] OR Nutrition Assessment[mh] OR Nutrition Therapy[mh] OR Nutrition Policy[mh] OR Nutritional and Metabolic Diseases[mh] OR nutrition\*[tiab] OR diet[tiab] OR feeding[tiab] OR dietary[tiab] OR breastfeed\*[tiab] OR breast feed\*[tiab] OR lactation[tiab] OR bottle feed\*[tiab] OR complementary feeding[tiab] OR weaning[tiab] OR enteral[tiab] OR parenteral[tiab] OR Feeding Methods[mh] OR nutritional status[tiab] OR overweight[tiab] OR obese[tiab] OR obesity[tiab] OR overnutrition[tiab] OR over nutrition[tiab] OR undernourished[tiab] OR overnourished[tiab] OR wasted[tiab] OR wasting[tiab] OR stunting[tiab] OR stunted[tiab] OR underweight[tiab] OR undernutrition[tiab] OR under nutrition[tiab] OR body weight[tiab] OR anthropometry[tiab] OR Body Weights and Measures[mh] OR growth monitoring[tiab] OR food[tiab] OR food labelling[mh] OR food assistance[mh] OR supplementary feeding[tiab] OR diet therapy[mh] OR food and beverages[mh] OR vegetable\*[tiab] OR fruit\*[tiab] OR meat[tiab] OR dairy[tiab] OR dietary fat\*[tiab] OR starch\*[tiab] OR cereal[tiab] OR food-drug interactions[mh] OR food supply[mh] OR feeding behavio\*[tiab] OR eating behavio\*[tiab] OR food pattern\*[tiab] OR food hypersensitivity[mh] OR food deprivation[mh] OR food, organic [mh] OR micronutrient\*[tiab] OR vitamin\*[tiab] OR thiamin[tiab] OR riboflavin[tiab] OR niacin[tiab] OR pantothenic acid[tiab] OR pyridoxine[tiab] OR pyridoxal[tiab] OR pyridoxamine[tiab] OR biotin[tiab] OR folic acid[tiab] OR folate[tiab] OR cyanocobalamin[tiab] OR choline[tiab] OR retinol[tiab] OR ascorbic acid[tiab] OR tocopherol[tiab] OR carotenoids[tiab] OR carotene[tiab] OR cryptoxanthin[tiab] OR lutein[tiab] OR lycopene[tiab] OR zeaxanthin[tiab] OR minerals[tiab] OR calcium[tiab] OR chloride[tiab] OR magnesium[tiab] OR phosphorus[tiab] OR potassium[tiab] OR sodium[tiab] OR iron[tiab] OR sulphur[tiab] OR trace element\*[tiab] OR boron[tiab] OR cobalt[tiab] OR chromium[tiab] OR copper[tiab] OR fluoride[tiab] OR iodine[tiab] OR iron[tiab] OR manganese[tiab] OR molybdenum[tiab] OR selenium[tiab] OR zinc[tiab] OR trace metal\*[tiab] OR macronutrient\*[tiab] OR carbohydrate\*[tiab] OR dietary protein\*[tiab] OR saturated fat\*[tiab] OR unsaturated fat\*[tiab] OR mono unsaturated fat\*[tiab] OR monounsaturated fat\*[tiab] OR poly unsaturated fat\*[tiab] OR polyunsaturated fat\*[tiab] OR trans fat\*[tiab] OR dietary

fibre[tiab] OR dietary fiber[tiab] OR dietary salt[tiab] OR table salt[tiab] OR soft drink[tiab] OR fruit juice[tiab] OR vegetable juice[tiab] OR milk[tiab] OR tea[tiab] OR coffee[tiab] OR energy drink\*[tiab] OR carbonated beverage\*[tiab] OR carbonated drink\*[tiab] OR prebiotics[tiab] OR probiotics[tiab] OR glycemic load[tiab] OR glycemic index[tiab] OR glycaemic load[tiab] OR glycaemic index[tiab] OR calories[tiab] OR kilocalories[tiab] OR kilojoules[tiab] OR caloric intake[tiab] OR energy intake[tiab]

2. meta-analysis[pt] OR meta-analy\*[ti]

3. ("2018/01/01"[PDAT] : "2019/06/30"[PDAT])

4. 1 AND 2 AND 3

### **Epistemonikos search**

1. (advanced\_title\_en:(nutri\* OR diet\*) OR advanced\_abstract\_en:(nutri\* OR diet\*)) [Filters: protocol=no, min\_year=2018, max\_year=2019]

**Supplementary Table S2: Data collection form**

|                                                                                                                                                                            | #                                                     | Variable / Field Name                                                                | Field Label<br><i>Field Note</i>                                     | Field Attributes (Field Type, Validation, Choices, Calculations, etc.)                                                                                                                                                                                                                                                                           |   |                                                       |   |                              |   |                                         |   |                       |
|----------------------------------------------------------------------------------------------------------------------------------------------------------------------------|-------------------------------------------------------|--------------------------------------------------------------------------------------|----------------------------------------------------------------------|--------------------------------------------------------------------------------------------------------------------------------------------------------------------------------------------------------------------------------------------------------------------------------------------------------------------------------------------------|---|-------------------------------------------------------|---|------------------------------|---|-----------------------------------------|---|-----------------------|
| Instrument: <b>SR protocol characteristics</b> (sr_protocol_characteristics)                                                                                               |                                                       |                                                                                      |                                                                      |                                                                                                                                                                                                                                                                                                                                                  |   |                                                       |   |                              |   |                                         |   |                       |
|                                                                                           | 1                                                     | record_id                                                                            | Record ID:                                                           | text                                                                                                                                                                                                                                                                                                                                             |   |                                                       |   |                              |   |                                         |   |                       |
| <br>     | 2                                                     | sr_id                                                                                | SR ID (stated on page 1 of PDF):                                     | text                                                                                                                                                                                                                                                                                                                                             |   |                                                       |   |                              |   |                                         |   |                       |
| <br>     | 3                                                     | initials                                                                             | Enter initials of data collector:                                    | text                                                                                                                                                                                                                                                                                                                                             |   |                                                       |   |                              |   |                                         |   |                       |
| <br>     | 4                                                     | index_ma                                                                             | Specify the index meta-analysis outcome (stated on pg 1 of the PDF): | text                                                                                                                                                                                                                                                                                                                                             |   |                                                       |   |                              |   |                                         |   |                       |
| <br>     | 5                                                     | protocol_avail                                                                       | Is a protocol or registration record available for the SR?           | radio<br><table border="1" data-bbox="1064 909 1787 1133"> <tr> <td>1</td> <td>Both a protocol and registration record are available</td> </tr> <tr> <td>2</td> <td>Only a protocol is available</td> </tr> <tr> <td>3</td> <td>Only a registration record is available</td> </tr> <tr> <td>4</td> <td>Neither are available</td> </tr> </table> | 1 | Both a protocol and registration record are available | 2 | Only a protocol is available | 3 | Only a registration record is available | 4 | Neither are available |
| 1                                                                                                                                                                          | Both a protocol and registration record are available |                                                                                      |                                                                      |                                                                                                                                                                                                                                                                                                                                                  |   |                                                       |   |                              |   |                                         |   |                       |
| 2                                                                                                                                                                          | Only a protocol is available                          |                                                                                      |                                                                      |                                                                                                                                                                                                                                                                                                                                                  |   |                                                       |   |                              |   |                                         |   |                       |
| 3                                                                                                                                                                          | Only a registration record is available               |                                                                                      |                                                                      |                                                                                                                                                                                                                                                                                                                                                  |   |                                                       |   |                              |   |                                         |   |                       |
| 4                                                                                                                                                                          | Neither are available                                 |                                                                                      |                                                                      |                                                                                                                                                                                                                                                                                                                                                  |   |                                                       |   |                              |   |                                         |   |                       |
| <br> | 6                                                     | srp_year<br>Show the field ONLY if: [protocol_avail] = '1' or [protocol_avail] = '2' | Specify the year of publication of the protocol:                     | text                                                                                                                                                                                                                                                                                                                                             |   |                                                       |   |                              |   |                                         |   |                       |
| <br> | 7                                                     | regist_year<br>Show the field ONLY if:                                               | Specify the year the SR was first registered:                        | text                                                                                                                                                                                                                                                                                                                                             |   |                                                       |   |                              |   |                                         |   |                       |

|                                                                                                                                                                            |           |                                                                                                                 |                                                                                                                                                   |                                                                                                                                                                                                                                                                                                                                                                                                                                                                                                                                                                                                                                                                                                                                                                                                                                                                                                                                                                                                                                                                                                                                                                                                                                                                                                           |   |           |                                                                                                   |   |           |                                                                                                           |   |          |                                                        |   |          |                                        |   |          |                                     |   |          |                                                                                               |   |          |                                                                                                              |   |          |                                                                                             |   |          |                                                                                                     |    |           |                                                                                            |
|----------------------------------------------------------------------------------------------------------------------------------------------------------------------------|-----------|-----------------------------------------------------------------------------------------------------------------|---------------------------------------------------------------------------------------------------------------------------------------------------|-----------------------------------------------------------------------------------------------------------------------------------------------------------------------------------------------------------------------------------------------------------------------------------------------------------------------------------------------------------------------------------------------------------------------------------------------------------------------------------------------------------------------------------------------------------------------------------------------------------------------------------------------------------------------------------------------------------------------------------------------------------------------------------------------------------------------------------------------------------------------------------------------------------------------------------------------------------------------------------------------------------------------------------------------------------------------------------------------------------------------------------------------------------------------------------------------------------------------------------------------------------------------------------------------------------|---|-----------|---------------------------------------------------------------------------------------------------|---|-----------|-----------------------------------------------------------------------------------------------------------|---|----------|--------------------------------------------------------|---|----------|----------------------------------------|---|----------|-------------------------------------|---|----------|-----------------------------------------------------------------------------------------------|---|----------|--------------------------------------------------------------------------------------------------------------|---|----------|---------------------------------------------------------------------------------------------|---|----------|-----------------------------------------------------------------------------------------------------|----|-----------|--------------------------------------------------------------------------------------------|
|                                                                                                                                                                            |           | [protocol_avail] = '1' or [protocol_avail] = '3'                                                                |                                                                                                                                                   |                                                                                                                                                                                                                                                                                                                                                                                                                                                                                                                                                                                                                                                                                                                                                                                                                                                                                                                                                                                                                                                                                                                                                                                                                                                                                                           |   |           |                                                                                                   |   |           |                                                                                                           |   |          |                                                        |   |          |                                        |   |          |                                     |   |          |                                                                                               |   |          |                                                                                                              |   |          |                                                                                             |   |          |                                                                                                     |    |           |                                                                                            |
| <br>     | 8         | srp_e<br>Show the field ONLY if:<br>[protocol_avail] = '1' or [protocol_avail] = '2' or [protocol_avail] = '3'  | Section<br>Header: <i>Eligibility criteria and decision rules</i><br><br>Review authors pre-specified...(select ALL of the following that apply): | checkbox<br><table border="1"> <tr> <td>1</td> <td>srp_e__1</td> <td>...eligible measurement instruments for [index_ma]</td> </tr> <tr> <td>2</td> <td>srp_e__2</td> <td>...eligible definitions/diagnostic criteria for [index_ma]</td> </tr> <tr> <td>3</td> <td>srp_e__3</td> <td>...eligible cut-points on an instrument for [index_ma]</td> </tr> <tr> <td>4</td> <td>srp_e__4</td> <td>...eligible time points for [index_ma]</td> </tr> <tr> <td>5</td> <td>srp_e__5</td> <td>...eligible interventions/exposures</td> </tr> <tr> <td>6</td> <td>srp_e__6</td> <td>...whether final values or change from baseline values (or both) for [index_ma] were eligible</td> </tr> <tr> <td>7</td> <td>srp_e__7</td> <td>...which analysis samples for [index_ma] were eligible (e.g. intention-to-treat, per-protocol or as-treated)</td> </tr> <tr> <td>8</td> <td>srp_e__8</td> <td>...whether unadjusted or covariate-adjusted analyses (or both) for [index_ma] were eligible</td> </tr> <tr> <td>9</td> <td>srp_e__9</td> <td>...whether period or paired analyses (or both) for [index_ma] were eligible (from crossover trials)</td> </tr> <tr> <td>10</td> <td>srp_e__10</td> <td>...which information sources were eligible (e.g. journal article, trials results register)</td> </tr> </table> | 1 | srp_e__1  | ...eligible measurement instruments for [index_ma]                                                | 2 | srp_e__2  | ...eligible definitions/diagnostic criteria for [index_ma]                                                | 3 | srp_e__3 | ...eligible cut-points on an instrument for [index_ma] | 4 | srp_e__4 | ...eligible time points for [index_ma] | 5 | srp_e__5 | ...eligible interventions/exposures | 6 | srp_e__6 | ...whether final values or change from baseline values (or both) for [index_ma] were eligible | 7 | srp_e__7 | ...which analysis samples for [index_ma] were eligible (e.g. intention-to-treat, per-protocol or as-treated) | 8 | srp_e__8 | ...whether unadjusted or covariate-adjusted analyses (or both) for [index_ma] were eligible | 9 | srp_e__9 | ...whether period or paired analyses (or both) for [index_ma] were eligible (from crossover trials) | 10 | srp_e__10 | ...which information sources were eligible (e.g. journal article, trials results register) |
| 1                                                                                                                                                                          | srp_e__1  | ...eligible measurement instruments for [index_ma]                                                              |                                                                                                                                                   |                                                                                                                                                                                                                                                                                                                                                                                                                                                                                                                                                                                                                                                                                                                                                                                                                                                                                                                                                                                                                                                                                                                                                                                                                                                                                                           |   |           |                                                                                                   |   |           |                                                                                                           |   |          |                                                        |   |          |                                        |   |          |                                     |   |          |                                                                                               |   |          |                                                                                                              |   |          |                                                                                             |   |          |                                                                                                     |    |           |                                                                                            |
| 2                                                                                                                                                                          | srp_e__2  | ...eligible definitions/diagnostic criteria for [index_ma]                                                      |                                                                                                                                                   |                                                                                                                                                                                                                                                                                                                                                                                                                                                                                                                                                                                                                                                                                                                                                                                                                                                                                                                                                                                                                                                                                                                                                                                                                                                                                                           |   |           |                                                                                                   |   |           |                                                                                                           |   |          |                                                        |   |          |                                        |   |          |                                     |   |          |                                                                                               |   |          |                                                                                                              |   |          |                                                                                             |   |          |                                                                                                     |    |           |                                                                                            |
| 3                                                                                                                                                                          | srp_e__3  | ...eligible cut-points on an instrument for [index_ma]                                                          |                                                                                                                                                   |                                                                                                                                                                                                                                                                                                                                                                                                                                                                                                                                                                                                                                                                                                                                                                                                                                                                                                                                                                                                                                                                                                                                                                                                                                                                                                           |   |           |                                                                                                   |   |           |                                                                                                           |   |          |                                                        |   |          |                                        |   |          |                                     |   |          |                                                                                               |   |          |                                                                                                              |   |          |                                                                                             |   |          |                                                                                                     |    |           |                                                                                            |
| 4                                                                                                                                                                          | srp_e__4  | ...eligible time points for [index_ma]                                                                          |                                                                                                                                                   |                                                                                                                                                                                                                                                                                                                                                                                                                                                                                                                                                                                                                                                                                                                                                                                                                                                                                                                                                                                                                                                                                                                                                                                                                                                                                                           |   |           |                                                                                                   |   |           |                                                                                                           |   |          |                                                        |   |          |                                        |   |          |                                     |   |          |                                                                                               |   |          |                                                                                                              |   |          |                                                                                             |   |          |                                                                                                     |    |           |                                                                                            |
| 5                                                                                                                                                                          | srp_e__5  | ...eligible interventions/exposures                                                                             |                                                                                                                                                   |                                                                                                                                                                                                                                                                                                                                                                                                                                                                                                                                                                                                                                                                                                                                                                                                                                                                                                                                                                                                                                                                                                                                                                                                                                                                                                           |   |           |                                                                                                   |   |           |                                                                                                           |   |          |                                                        |   |          |                                        |   |          |                                     |   |          |                                                                                               |   |          |                                                                                                              |   |          |                                                                                             |   |          |                                                                                                     |    |           |                                                                                            |
| 6                                                                                                                                                                          | srp_e__6  | ...whether final values or change from baseline values (or both) for [index_ma] were eligible                   |                                                                                                                                                   |                                                                                                                                                                                                                                                                                                                                                                                                                                                                                                                                                                                                                                                                                                                                                                                                                                                                                                                                                                                                                                                                                                                                                                                                                                                                                                           |   |           |                                                                                                   |   |           |                                                                                                           |   |          |                                                        |   |          |                                        |   |          |                                     |   |          |                                                                                               |   |          |                                                                                                              |   |          |                                                                                             |   |          |                                                                                                     |    |           |                                                                                            |
| 7                                                                                                                                                                          | srp_e__7  | ...which analysis samples for [index_ma] were eligible (e.g. intention-to-treat, per-protocol or as-treated)    |                                                                                                                                                   |                                                                                                                                                                                                                                                                                                                                                                                                                                                                                                                                                                                                                                                                                                                                                                                                                                                                                                                                                                                                                                                                                                                                                                                                                                                                                                           |   |           |                                                                                                   |   |           |                                                                                                           |   |          |                                                        |   |          |                                        |   |          |                                     |   |          |                                                                                               |   |          |                                                                                                              |   |          |                                                                                             |   |          |                                                                                                     |    |           |                                                                                            |
| 8                                                                                                                                                                          | srp_e__8  | ...whether unadjusted or covariate-adjusted analyses (or both) for [index_ma] were eligible                     |                                                                                                                                                   |                                                                                                                                                                                                                                                                                                                                                                                                                                                                                                                                                                                                                                                                                                                                                                                                                                                                                                                                                                                                                                                                                                                                                                                                                                                                                                           |   |           |                                                                                                   |   |           |                                                                                                           |   |          |                                                        |   |          |                                        |   |          |                                     |   |          |                                                                                               |   |          |                                                                                                              |   |          |                                                                                             |   |          |                                                                                                     |    |           |                                                                                            |
| 9                                                                                                                                                                          | srp_e__9  | ...whether period or paired analyses (or both) for [index_ma] were eligible (from crossover trials)             |                                                                                                                                                   |                                                                                                                                                                                                                                                                                                                                                                                                                                                                                                                                                                                                                                                                                                                                                                                                                                                                                                                                                                                                                                                                                                                                                                                                                                                                                                           |   |           |                                                                                                   |   |           |                                                                                                           |   |          |                                                        |   |          |                                        |   |          |                                     |   |          |                                                                                               |   |          |                                                                                                              |   |          |                                                                                             |   |          |                                                                                                     |    |           |                                                                                            |
| 10                                                                                                                                                                         | srp_e__10 | ...which information sources were eligible (e.g. journal article, trials results register)                      |                                                                                                                                                   |                                                                                                                                                                                                                                                                                                                                                                                                                                                                                                                                                                                                                                                                                                                                                                                                                                                                                                                                                                                                                                                                                                                                                                                                                                                                                                           |   |           |                                                                                                   |   |           |                                                                                                           |   |          |                                                        |   |          |                                        |   |          |                                     |   |          |                                                                                               |   |          |                                                                                                              |   |          |                                                                                             |   |          |                                                                                                     |    |           |                                                                                            |
| <br> | 9         | srp_dr<br>Show the field ONLY if:<br>[protocol_avail] = '1' or [protocol_avail] = '2' or [protocol_avail] = '3' | Review authors pre-specified...(select ALL of the following that apply):                                                                          | checkbox<br><table border="1"> <tr> <td>1</td> <td>srp_dr__1</td> <td>...a decision rule to handle results arising from multiple measurement instruments for [index_ma]</td> </tr> <tr> <td>2</td> <td>srp_dr__2</td> <td>...a decision rule to handle results arising from multiple definitions/diagnostic criteria for [index_ma]</td> </tr> </table>                                                                                                                                                                                                                                                                                                                                                                                                                                                                                                                                                                                                                                                                                                                                                                                                                                                                                                                                                   | 1 | srp_dr__1 | ...a decision rule to handle results arising from multiple measurement instruments for [index_ma] | 2 | srp_dr__2 | ...a decision rule to handle results arising from multiple definitions/diagnostic criteria for [index_ma] |   |          |                                                        |   |          |                                        |   |          |                                     |   |          |                                                                                               |   |          |                                                                                                              |   |          |                                                                                             |   |          |                                                                                                     |    |           |                                                                                            |
| 1                                                                                                                                                                          | srp_dr__1 | ...a decision rule to handle results arising from multiple measurement instruments for [index_ma]               |                                                                                                                                                   |                                                                                                                                                                                                                                                                                                                                                                                                                                                                                                                                                                                                                                                                                                                                                                                                                                                                                                                                                                                                                                                                                                                                                                                                                                                                                                           |   |           |                                                                                                   |   |           |                                                                                                           |   |          |                                                        |   |          |                                        |   |          |                                     |   |          |                                                                                               |   |          |                                                                                                              |   |          |                                                                                             |   |          |                                                                                                     |    |           |                                                                                            |
| 2                                                                                                                                                                          | srp_dr__2 | ...a decision rule to handle results arising from multiple definitions/diagnostic criteria for [index_ma]       |                                                                                                                                                   |                                                                                                                                                                                                                                                                                                                                                                                                                                                                                                                                                                                                                                                                                                                                                                                                                                                                                                                                                                                                                                                                                                                                                                                                                                                                                                           |   |           |                                                                                                   |   |           |                                                                                                           |   |          |                                                        |   |          |                                        |   |          |                                     |   |          |                                                                                               |   |          |                                                                                                              |   |          |                                                                                             |   |          |                                                                                                     |    |           |                                                                                            |

|  |  |  |  |    |             |                                                                                                                                                                          |
|--|--|--|--|----|-------------|--------------------------------------------------------------------------------------------------------------------------------------------------------------------------|
|  |  |  |  | 3  | srp_dr___3  | ...a decision rule to handle results arising from multiple cut-points on an instrument for [index_ma]                                                                    |
|  |  |  |  | 4  | srp_dr___4  | ...a decision rule to handle results arising from multiple time points for [index_ma]                                                                                    |
|  |  |  |  | 5  | srp_dr___5  | ...a decision rule to handle results arising from multiple interventions/exposures                                                                                       |
|  |  |  |  | 6  | srp_dr___6  | ...a decision rule to handle results arising from both final values and change from baseline values for [index_ma]                                                       |
|  |  |  |  | 7  | srp_dr___7  | ...a decision rule to handle results arising from multiple analysis samples (e.g. intention-to-treat, per-protocol or as-treated) for [index_ma]                         |
|  |  |  |  | 8  | srp_dr___8  | ...a decision rule to handle results arising from multiple unadjusted or covariate-adjusted analyses for [index_ma]                                                      |
|  |  |  |  | 9  | srp_dr___9  | ...a decision rule to handle results arising from period and paired analyses for [index_ma] in crossover trials                                                          |
|  |  |  |  | 10 | srp_dr___10 | ...a decision rule to handle results arising from multiple information sources (e.g. journal article, trials results register)                                           |
|  |  |  |  | 11 | srp_dr___11 | ...a decision rule to handle results arising from overlapping samples of participants (e.g. subgroup of men of all ages and subgroup of older adults which includes men) |
|  |  |  |  | 12 | srp_dr___12 | ...a decision rule to handle results arising from another source of multiplicity                                                                                         |



|                                                                                                                                                                            |    |                                                                     |                                                                                                                   |       |
|----------------------------------------------------------------------------------------------------------------------------------------------------------------------------|----|---------------------------------------------------------------------|-------------------------------------------------------------------------------------------------------------------|-------|
| <br>     | 10 | srp_e_scale_txt<br>Show the field ONLY if:<br>[srp_e(1)] = '1'      | Specify the eligible measurement instruments for [index_ma]:                                                      | notes |
| <br>     | 11 | srp_dr_scale_txt<br>Show the field ONLY if:<br>[srp_dr(1)] = '1'    | Specify the decision rule to handle results arising from multiple measurement instruments for [index_ma]:         | notes |
| <br>     | 12 | srp_e_event_txt<br>Show the field ONLY if:<br>[srp_e(2)] = '1'      | Specify the eligible definitions/diagnostic criteria for [index_ma]:                                              | notes |
| <br>     | 13 | srp_dr_event_txt<br>Show the field ONLY if:<br>[srp_dr(2)] = '1'    | Specify the decision rule to handle results arising from multiple definitions/diagnostic criteria for [index_ma]: | notes |
| <br>    | 14 | srp_e_cutpoint_txt<br>Show the field ONLY if:<br>[srp_e(3)] = '1'   | Specify the eligible cut-points on an instrument for [index_ma]:                                                  | notes |
| <br> | 15 | srp_dr_cutpoint_txt<br>Show the field ONLY if:<br>[srp_dr(3)] = '1' | Specify the decision rule to handle results arising from multiple cut-points on an instrument for [index_ma]:     | notes |

|                                                                                                                                                                            |    |                                                                  |                                                                                                                     |       |
|----------------------------------------------------------------------------------------------------------------------------------------------------------------------------|----|------------------------------------------------------------------|---------------------------------------------------------------------------------------------------------------------|-------|
| <br>     | 16 | srp_e_time_txt<br>Show the field ONLY if:<br>[srp_e(4)] = '1'    | Specify the eligible time points for [index_ma]:                                                                    | notes |
| <br>     | 17 | srp_dr_time_txt<br>Show the field ONLY if:<br>[srp_dr(4)] = '1'  | Specify the decision rule to handle results arising from multiple time points for [index_ma]:                       | notes |
| <br>     | 18 | srp_e_group_txt<br>Show the field ONLY if:<br>[srp_e(5)] = '1'   | Specify the eligible interventions/exposures (incl. comparators):                                                   | notes |
| <br>     | 19 | srp_dr_group_txt<br>Show the field ONLY if:<br>[srp_dr(5)] = '1' | Specify the decision rule to handle results arising from multiple interventions/exposures:                          | notes |
| <br>     | 20 | srp_e_fvcs_txt<br>Show the field ONLY if:<br>[srp_e(6)] = '1'    | Specify which values (i.e. final, change from baseline or both) for [index_ma] were eligible:                       | notes |
| <br> | 21 | srp_dr_fvcs_txt<br>Show the field ONLY if:<br>[srp_dr(6)] = '1'  | Specify the decision rule to handle results arising from both final and change from baseline values for [index_ma]: | notes |
| <br> | 22 | srp_e_itt_txt<br>Show the field ONLY if:<br>[srp_e(7)] = '1'     | Specify which analysis samples (e.g. intention-to-treat, per-protocol)                                              | notes |

|                                                                                                                                                                            |    |                                                                  |                                                                                                                                            |       |
|----------------------------------------------------------------------------------------------------------------------------------------------------------------------------|----|------------------------------------------------------------------|--------------------------------------------------------------------------------------------------------------------------------------------|-------|
|                                                                                                                                                                            |    |                                                                  | for [index_ma] were eligible:                                                                                                              |       |
| <br>     | 23 | srp_dr_itt_txt<br>Show the field ONLY if:<br>[srp_dr(7)] = '1'   | Specify the decision rule to handle results arising from multiple analysis samples (e.g. intention-to-treat, per-protocol) for [index_ma]: | notes |
| <br>     | 24 | srp_e_unadj_txt<br>Show the field ONLY if:<br>[srp_e(8)] = '1'   | Specify which unadjusted and covariate-adjusted analyses for [index_ma] were eligible:                                                     | notes |
| <br>     | 25 | srp_dr_unadj_txt<br>Show the field ONLY if:<br>[srp_dr(8)] = '1' | Specify the decision rule to handle results arising from multiple unadjusted and covariate-adjusted analyses for [index_ma]:               | notes |
| <br> | 26 | srp_e_cross_txt<br>Show the field ONLY if:<br>[srp_e(9)] = '1'   | Specify which analyses in crossover trials (e.g. first period, second period, paired) were eligible:                                       | notes |
| <br> | 27 | srp_dr_cross_txt<br>Show the field ONLY if:<br>[srp_dr(9)] = '1' | Specify the decision rule to handle results arising from period and                                                                        | notes |

|                                                                                                                                                                            |            |                                                                     |                                                                                                                                        |                                                                                                                             |   |            |   |            |
|----------------------------------------------------------------------------------------------------------------------------------------------------------------------------|------------|---------------------------------------------------------------------|----------------------------------------------------------------------------------------------------------------------------------------|-----------------------------------------------------------------------------------------------------------------------------|---|------------|---|------------|
|                                                                                                                                                                            |            |                                                                     | paired analyses in crossover trials:                                                                                                   |                                                                                                                             |   |            |   |            |
| <br>     | 28         | srp_e_source_txt<br>Show the field ONLY if:<br>[srp_e(10)] = '1'    | Specify which information sources (e.g. journal article, trials results register) were eligible:                                       | notes                                                                                                                       |   |            |   |            |
| <br>     | 29         | srp_dr_source_txt<br>Show the field ONLY if:<br>[srp_dr(10)] = '1'  | Specify the decision rule to handle results arising from multiple information sources (e.g. journal article, trials results register): | notes                                                                                                                       |   |            |   |            |
| <br>     | 30         | srp_dr_overlap_txt<br>Show the field ONLY if:<br>[srp_dr(11)] = '1' | Specify the decision rule to handle results arising from overlapping samples of participants:                                          | notes                                                                                                                       |   |            |   |            |
| <br>    | 31         | srp_dr_other_txt<br>Show the field ONLY if:<br>[srp_dr(12)] = '1'   | Specify the decision rule(s) to handle results arising from other sources of multiplicity for [index_ma]:                              | notes                                                                                                                       |   |            |   |            |
| <br> | 32         | srp_notes                                                           | Notes                                                                                                                                  | notes                                                                                                                       |   |            |   |            |
|                                                                                                                                                                            | 33         | sr_protocol_characteristics_complete                                | Section Header: <i>Form Status</i><br>Complete?                                                                                        | dropdown<br><table border="1"> <tr> <td>0</td> <td>Incomplete</td> </tr> <tr> <td>1</td> <td>Unverified</td> </tr> </table> | 0 | Incomplete | 1 | Unverified |
| 0                                                                                                                                                                          | Incomplete |                                                                     |                                                                                                                                        |                                                                                                                             |   |            |   |            |
| 1                                                                                                                                                                          | Unverified |                                                                     |                                                                                                                                        |                                                                                                                             |   |            |   |            |

|                                                                                                                                                                            |                |                                                                                       |                                                            |                                                                                                                                                                                                                                      |   |               |   |                |   |       |   |            |   |              |
|----------------------------------------------------------------------------------------------------------------------------------------------------------------------------|----------------|---------------------------------------------------------------------------------------|------------------------------------------------------------|--------------------------------------------------------------------------------------------------------------------------------------------------------------------------------------------------------------------------------------|---|---------------|---|----------------|---|-------|---|------------|---|--------------|
|                                                                                                                                                                            |                |                                                                                       |                                                            | 2 Complete                                                                                                                                                                                                                           |   |               |   |                |   |       |   |            |   |              |
| Instrument: <b>SR characteristics</b> (sr_characteristics)                                                                                                                 |                |                                                                                       |                                                            |                                                                                                                                                                                                                                      |   |               |   |                |   |       |   |            |   |              |
| <br>     | 34             | sr_title                                                                              | Specify the title of the systematic review:                | text                                                                                                                                                                                                                                 |   |               |   |                |   |       |   |            |   |              |
| <br>     | 35             | sr_journal                                                                            | Specify the journal:                                       | text                                                                                                                                                                                                                                 |   |               |   |                |   |       |   |            |   |              |
| <br>     | 36             | sr_year                                                                               | Specify the year of publication:                           | text                                                                                                                                                                                                                                 |   |               |   |                |   |       |   |            |   |              |
| <br>     | 37             | sr_country                                                                            | Specify the country of the corresponding author of the SR: | text                                                                                                                                                                                                                                 |   |               |   |                |   |       |   |            |   |              |
| <br>     | 38             | sr_funding                                                                            | What was the source of funding for the SR?                 | radio<br><table border="1"> <tr><td>1</td><td>Non-profit</td></tr> <tr><td>2</td><td>For-profit</td></tr> <tr><td>3</td><td>Mixed</td></tr> <tr><td>4</td><td>No funding</td></tr> <tr><td>5</td><td>Not reported</td></tr> </table> | 1 | Non-profit    | 2 | For-profit     | 3 | Mixed | 4 | No funding | 5 | Not reported |
| 1                                                                                                                                                                          | Non-profit     |                                                                                       |                                                            |                                                                                                                                                                                                                                      |   |               |   |                |   |       |   |            |   |              |
| 2                                                                                                                                                                          | For-profit     |                                                                                       |                                                            |                                                                                                                                                                                                                                      |   |               |   |                |   |       |   |            |   |              |
| 3                                                                                                                                                                          | Mixed          |                                                                                       |                                                            |                                                                                                                                                                                                                                      |   |               |   |                |   |       |   |            |   |              |
| 4                                                                                                                                                                          | No funding     |                                                                                       |                                                            |                                                                                                                                                                                                                                      |   |               |   |                |   |       |   |            |   |              |
| 5                                                                                                                                                                          | Not reported   |                                                                                       |                                                            |                                                                                                                                                                                                                                      |   |               |   |                |   |       |   |            |   |              |
| <br> | 39             | for_profit_org<br>Show the field ONLY if:<br>[sr_funding] = '2' or [sr_funding] = '3' | What type of for-profit organisation funded the SR?        | radio<br><table border="1"> <tr><td>1</td><td>Food industry</td></tr> <tr><td>2</td><td>Other industry</td></tr> </table>                                                                                                            | 1 | Food industry | 2 | Other industry |   |       |   |            |   |              |
| 1                                                                                                                                                                          | Food industry  |                                                                                       |                                                            |                                                                                                                                                                                                                                      |   |               |   |                |   |       |   |            |   |              |
| 2                                                                                                                                                                          | Other industry |                                                                                       |                                                            |                                                                                                                                                                                                                                      |   |               |   |                |   |       |   |            |   |              |
| <br> | 40             | for_profit_org_txt<br>Show the field ONLY if:                                         | Record the name of the for-profit funder:                  | text                                                                                                                                                                                                                                 |   |               |   |                |   |       |   |            |   |              |

|                                                                                                                                                                            |                                                                                                                                                                                    |                                                         |                                                                                                |                                                                                                                                                                                                                                                                                                                                                                                                                                                      |   |                                                                                                                                                                                    |   |                                                                                      |   |                                        |   |       |   |         |
|----------------------------------------------------------------------------------------------------------------------------------------------------------------------------|------------------------------------------------------------------------------------------------------------------------------------------------------------------------------------|---------------------------------------------------------|------------------------------------------------------------------------------------------------|------------------------------------------------------------------------------------------------------------------------------------------------------------------------------------------------------------------------------------------------------------------------------------------------------------------------------------------------------------------------------------------------------------------------------------------------------|---|------------------------------------------------------------------------------------------------------------------------------------------------------------------------------------|---|--------------------------------------------------------------------------------------|---|----------------------------------------|---|-------|---|---------|
|                                                                                                                                                                            |                                                                                                                                                                                    | [sr_funding] = '2' or [sr_funding] = '3'                |                                                                                                |                                                                                                                                                                                                                                                                                                                                                                                                                                                      |   |                                                                                                                                                                                    |   |                                                                                      |   |                                        |   |       |   |         |
| <br>     | 41                                                                                                                                                                                 | sr_coi                                                  | Did any of the systematic reviewers disclose financial conflicts of interest?                  | <p>radio</p> <table border="1"> <tr> <td>1</td> <td>Conflict of interest present (i.e. at least one systematic reviewer reported a financial conflict of interest of any type, excluding current study funding or industry employment)</td> </tr> <tr> <td>2</td> <td>No conflict of interest (i.e. all systematic reviewers stated they had no conflicts)</td> </tr> <tr> <td>3</td> <td>Missing (i.e. no disclosure statement)</td> </tr> </table> | 1 | Conflict of interest present (i.e. at least one systematic reviewer reported a financial conflict of interest of any type, excluding current study funding or industry employment) | 2 | No conflict of interest (i.e. all systematic reviewers stated they had no conflicts) | 3 | Missing (i.e. no disclosure statement) |   |       |   |         |
| 1                                                                                                                                                                          | Conflict of interest present (i.e. at least one systematic reviewer reported a financial conflict of interest of any type, excluding current study funding or industry employment) |                                                         |                                                                                                |                                                                                                                                                                                                                                                                                                                                                                                                                                                      |   |                                                                                                                                                                                    |   |                                                                                      |   |                                        |   |       |   |         |
| 2                                                                                                                                                                          | No conflict of interest (i.e. all systematic reviewers stated they had no conflicts)                                                                                               |                                                         |                                                                                                |                                                                                                                                                                                                                                                                                                                                                                                                                                                      |   |                                                                                                                                                                                    |   |                                                                                      |   |                                        |   |       |   |         |
| 3                                                                                                                                                                          | Missing (i.e. no disclosure statement)                                                                                                                                             |                                                         |                                                                                                |                                                                                                                                                                                                                                                                                                                                                                                                                                                      |   |                                                                                                                                                                                    |   |                                                                                      |   |                                        |   |       |   |         |
| <br>     | 42                                                                                                                                                                                 | sr_coi_txt<br>Show the field ONLY if:<br>[sr_coi] = '1' | Record verbatim the conflict(s) of interest disclosed by the authors:                          | notes                                                                                                                                                                                                                                                                                                                                                                                                                                                |   |                                                                                                                                                                                    |   |                                                                                      |   |                                        |   |       |   |         |
| <br>     | 43                                                                                                                                                                                 | sr_affiliat                                             | What type of affiliation did the corresponding author of the SR have?                          | <p>radio</p> <table border="1"> <tr> <td>1</td> <td>Food industry</td> </tr> <tr> <td>4</td> <td>Other industry</td> </tr> <tr> <td>2</td> <td>Non-industry</td> </tr> <tr> <td>3</td> <td>Mixed</td> </tr> <tr> <td>5</td> <td>Unclear</td> </tr> </table>                                                                                                                                                                                          | 1 | Food industry                                                                                                                                                                      | 4 | Other industry                                                                       | 2 | Non-industry                           | 3 | Mixed | 5 | Unclear |
| 1                                                                                                                                                                          | Food industry                                                                                                                                                                      |                                                         |                                                                                                |                                                                                                                                                                                                                                                                                                                                                                                                                                                      |   |                                                                                                                                                                                    |   |                                                                                      |   |                                        |   |       |   |         |
| 4                                                                                                                                                                          | Other industry                                                                                                                                                                     |                                                         |                                                                                                |                                                                                                                                                                                                                                                                                                                                                                                                                                                      |   |                                                                                                                                                                                    |   |                                                                                      |   |                                        |   |       |   |         |
| 2                                                                                                                                                                          | Non-industry                                                                                                                                                                       |                                                         |                                                                                                |                                                                                                                                                                                                                                                                                                                                                                                                                                                      |   |                                                                                                                                                                                    |   |                                                                                      |   |                                        |   |       |   |         |
| 3                                                                                                                                                                          | Mixed                                                                                                                                                                              |                                                         |                                                                                                |                                                                                                                                                                                                                                                                                                                                                                                                                                                      |   |                                                                                                                                                                                    |   |                                                                                      |   |                                        |   |       |   |         |
| 5                                                                                                                                                                          | Unclear                                                                                                                                                                            |                                                         |                                                                                                |                                                                                                                                                                                                                                                                                                                                                                                                                                                      |   |                                                                                                                                                                                    |   |                                                                                      |   |                                        |   |       |   |         |
| <br> | 44                                                                                                                                                                                 | ma_n_studies                                            | Section<br>Header: <i>General characteristics of the index meta-analysis (i.e. [index_ma])</i> | text                                                                                                                                                                                                                                                                                                                                                                                                                                                 |   |                                                                                                                                                                                    |   |                                                                                      |   |                                        |   |       |   |         |

|                                                                                                                                                                            |    |                 |                                                                                                                                                                               |      |
|----------------------------------------------------------------------------------------------------------------------------------------------------------------------------|----|-----------------|-------------------------------------------------------------------------------------------------------------------------------------------------------------------------------|------|
|                                                                                                                                                                            |    |                 | Specify the total number of studies included in the index meta-analysis (stated on page 1 of PDF):                                                                            |      |
| <br>     | 45 | ma_n_patients   | Specify the total number of participants included in the index meta-analysis (sum values presented on the forest plot/table or type 'NR' if sample sizes were not available): | text |
| <br>     | 46 | ma_patients     | Specify the type of participants included in studies included in the index meta-analysis (e.g. "generally healthy", "normal weight"):                                         | text |
| <br> | 47 | ma_intervention | Specify the intervention/exposure investigated in the index meta-analysis (e.g. "red meat 3 times a week"):                                                                   | text |
| <br> | 48 | ma_comparator   | Specify the comparator investigated in the index meta-analysis                                                                                                                | text |

|                                                                                                                                                                            |                                                   |                    |                                                                                                                                                           |                                                                                                                                                                                                                           |   |                  |   |                      |   |                                                   |
|----------------------------------------------------------------------------------------------------------------------------------------------------------------------------|---------------------------------------------------|--------------------|-----------------------------------------------------------------------------------------------------------------------------------------------------------|---------------------------------------------------------------------------------------------------------------------------------------------------------------------------------------------------------------------------|---|------------------|---|----------------------|---|---------------------------------------------------|
|                                                                                                                                                                            |                                                   |                    | (e.g. "red meat once a month"):                                                                                                                           |                                                                                                                                                                                                                           |   |                  |   |                      |   |                                                   |
| <br>     | 49                                                | ma_study_type      | What type of studies were included in the index meta-analysis?                                                                                            | radio<br><table border="1"> <tr> <td>1</td> <td>Randomized trial</td> </tr> <tr> <td>2</td> <td>Non-randomized study</td> </tr> <tr> <td>3</td> <td>Both randomized trials and non-randomized studies</td> </tr> </table> | 1 | Randomized trial | 2 | Non-randomized study | 3 | Both randomized trials and non-randomized studies |
| 1                                                                                                                                                                          | Randomized trial                                  |                    |                                                                                                                                                           |                                                                                                                                                                                                                           |   |                  |   |                      |   |                                                   |
| 2                                                                                                                                                                          | Non-randomized study                              |                    |                                                                                                                                                           |                                                                                                                                                                                                                           |   |                  |   |                      |   |                                                   |
| 3                                                                                                                                                                          | Both randomized trials and non-randomized studies |                    |                                                                                                                                                           |                                                                                                                                                                                                                           |   |                  |   |                      |   |                                                   |
| <br>     | 50                                                | ma_study_type_spec | Indicate the designs of the studies included in the index meta-analysis as specified by the systematic reviewers (e.g. cohort study, case-control study): | text                                                                                                                                                                                                                      |   |                  |   |                      |   |                                                   |
| <br>     | 51                                                | ma_outcome_spec    | Record how the index meta-analysis was specified (e.g. "weight" or "weight at 6 weeks" or "change in weight at 6 weeks"):                                 | text                                                                                                                                                                                                                      |   |                  |   |                      |   |                                                   |
| <br> | 52                                                | ma_domain          | Specify the outcome domain investigated in the index meta-analysis (e.g. all-cause mortality, body weight):                                               | text                                                                                                                                                                                                                      |   |                  |   |                      |   |                                                   |
| <br> | 53                                                | ma_outcome_label   | Specify the label given by the review authors to the index meta-analysis outcome:                                                                         | radio<br><table border="1"> <tr> <td>1</td> <td>Primary</td> </tr> <tr> <td>2</td> <td>Secondary</td> </tr> </table>                                                                                                      | 1 | Primary          | 2 | Secondary            |   |                                                   |
| 1                                                                                                                                                                          | Primary                                           |                    |                                                                                                                                                           |                                                                                                                                                                                                                           |   |                  |   |                      |   |                                                   |
| 2                                                                                                                                                                          | Secondary                                         |                    |                                                                                                                                                           |                                                                                                                                                                                                                           |   |                  |   |                      |   |                                                   |



|                                                                                                                                                                            |    |          |                                                                                                                                              |                                                                                                                                                                                                                                                                                                                                                                                                                                                                                                                                                                                                                                                                                                                                                                                                                                                                                                    |
|----------------------------------------------------------------------------------------------------------------------------------------------------------------------------|----|----------|----------------------------------------------------------------------------------------------------------------------------------------------|----------------------------------------------------------------------------------------------------------------------------------------------------------------------------------------------------------------------------------------------------------------------------------------------------------------------------------------------------------------------------------------------------------------------------------------------------------------------------------------------------------------------------------------------------------------------------------------------------------------------------------------------------------------------------------------------------------------------------------------------------------------------------------------------------------------------------------------------------------------------------------------------------|
|                                                                                                                                                                            |    |          |                                                                                                                                              | 3 Unlabelled                                                                                                                                                                                                                                                                                                                                                                                                                                                                                                                                                                                                                                                                                                                                                                                                                                                                                       |
| <br>     | 54 | ma_model | Specify the model for the index meta-analysis:                                                                                               | radio<br>1 Fixed-effect<br>2 Random-effects<br>3 Unclear                                                                                                                                                                                                                                                                                                                                                                                                                                                                                                                                                                                                                                                                                                                                                                                                                                           |
| <br>     | 55 | sr_e     | Section<br>Header: <i>Eligibility criteria and decision rules</i><br><br>Review authors reported...(select ALL of the following that apply): | checkbox<br>1 sr_e__1 ...eligible measurement instruments for [index_ma]<br>2 sr_e__2 ...eligible definitions/diagnostic criteria for [index_ma]<br>3 sr_e__3 ...eligible cut-points on an instrument for [index_ma]<br>4 sr_e__4 ...eligible time points for [index_ma]<br>5 sr_e__5 ...eligible interventions/exposures<br>6 sr_e__6 ...whether final values or change from baseline values (or both) for [index_ma] were eligible<br>7 sr_e__7 ...which analysis samples for [index_ma] were eligible (e.g. intention-to-treat, per-protocol or as-treated)<br>8 sr_e__8 ...whether unadjusted or covariate-adjusted analyses (or both) for [index_ma] were eligible<br>9 sr_e__9 ...whether period or paired analyses (or both) for [index_ma] were eligible (from crossover trials)<br>10 sr_e__10 ...which information sources were eligible (e.g. journal article, trials results register) |
| <br> | 56 | sr_dr    | Review authors reported...(select ALL                                                                                                        | checkbox                                                                                                                                                                                                                                                                                                                                                                                                                                                                                                                                                                                                                                                                                                                                                                                                                                                                                           |

|    |           |                                                                                                                                                                          |                                                                                                                                                                                                                                                                                                                                                                                                                                                                                                                                                                                                                                                                                                                                                                                                                                                                                                                                                                                                                                                                                                                                                                                                                                                                                                                                                                                                                                                                                                                                                                                                                                                                                                                                                                                                                                                                                                       |   |          |                                                                                                   |   |          |                                                                                                           |   |          |                                                                                                       |   |          |                                                                                       |   |          |                                                                                    |   |          |                                                                                                                    |   |          |                                                                                                                                                  |   |          |                                                                                                                     |   |          |                                                                                                                 |    |           |                                                                                                                                |    |           |                                                                                                                                                                          |
|----|-----------|--------------------------------------------------------------------------------------------------------------------------------------------------------------------------|-------------------------------------------------------------------------------------------------------------------------------------------------------------------------------------------------------------------------------------------------------------------------------------------------------------------------------------------------------------------------------------------------------------------------------------------------------------------------------------------------------------------------------------------------------------------------------------------------------------------------------------------------------------------------------------------------------------------------------------------------------------------------------------------------------------------------------------------------------------------------------------------------------------------------------------------------------------------------------------------------------------------------------------------------------------------------------------------------------------------------------------------------------------------------------------------------------------------------------------------------------------------------------------------------------------------------------------------------------------------------------------------------------------------------------------------------------------------------------------------------------------------------------------------------------------------------------------------------------------------------------------------------------------------------------------------------------------------------------------------------------------------------------------------------------------------------------------------------------------------------------------------------------|---|----------|---------------------------------------------------------------------------------------------------|---|----------|-----------------------------------------------------------------------------------------------------------|---|----------|-------------------------------------------------------------------------------------------------------|---|----------|---------------------------------------------------------------------------------------|---|----------|------------------------------------------------------------------------------------|---|----------|--------------------------------------------------------------------------------------------------------------------|---|----------|--------------------------------------------------------------------------------------------------------------------------------------------------|---|----------|---------------------------------------------------------------------------------------------------------------------|---|----------|-----------------------------------------------------------------------------------------------------------------|----|-----------|--------------------------------------------------------------------------------------------------------------------------------|----|-----------|--------------------------------------------------------------------------------------------------------------------------------------------------------------------------|
|    |           | of the following that apply):                                                                                                                                            | <table border="1"> <tr> <td>1</td> <td>sr_dr__1</td> <td>...a decision rule to handle results arising from multiple measurement instruments for [index_ma]</td> </tr> <tr> <td>2</td> <td>sr_dr__2</td> <td>...a decision rule to handle results arising from multiple definitions/diagnostic criteria for [index_ma]</td> </tr> <tr> <td>3</td> <td>sr_dr__3</td> <td>...a decision rule to handle results arising from multiple cut-points on an instrument for [index_ma]</td> </tr> <tr> <td>4</td> <td>sr_dr__4</td> <td>...a decision rule to handle results arising from multiple time points for [index_ma]</td> </tr> <tr> <td>5</td> <td>sr_dr__5</td> <td>...a decision rule to handle results arising from multiple interventions/exposures</td> </tr> <tr> <td>6</td> <td>sr_dr__6</td> <td>...a decision rule to handle results arising from both final values and change from baseline values for [index_ma]</td> </tr> <tr> <td>7</td> <td>sr_dr__7</td> <td>...a decision rule to handle results arising from multiple analysis samples (e.g. intention-to-treat, per-protocol or as-treated) for [index_ma]</td> </tr> <tr> <td>8</td> <td>sr_dr__8</td> <td>...a decision rule to handle results arising from multiple unadjusted or covariate-adjusted analyses for [index_ma]</td> </tr> <tr> <td>9</td> <td>sr_dr__9</td> <td>...a decision rule to handle results arising from period and paired analyses for [index_ma] in crossover trials</td> </tr> <tr> <td>10</td> <td>sr_dr__10</td> <td>...a decision rule to handle results arising from multiple information sources (e.g. journal article, trials results register)</td> </tr> <tr> <td>11</td> <td>sr_dr__11</td> <td>...a decision rule to handle results arising from overlapping samples of participants (e.g. subgroup of men of all ages and subgroup of older adults which includes men)</td> </tr> </table> | 1 | sr_dr__1 | ...a decision rule to handle results arising from multiple measurement instruments for [index_ma] | 2 | sr_dr__2 | ...a decision rule to handle results arising from multiple definitions/diagnostic criteria for [index_ma] | 3 | sr_dr__3 | ...a decision rule to handle results arising from multiple cut-points on an instrument for [index_ma] | 4 | sr_dr__4 | ...a decision rule to handle results arising from multiple time points for [index_ma] | 5 | sr_dr__5 | ...a decision rule to handle results arising from multiple interventions/exposures | 6 | sr_dr__6 | ...a decision rule to handle results arising from both final values and change from baseline values for [index_ma] | 7 | sr_dr__7 | ...a decision rule to handle results arising from multiple analysis samples (e.g. intention-to-treat, per-protocol or as-treated) for [index_ma] | 8 | sr_dr__8 | ...a decision rule to handle results arising from multiple unadjusted or covariate-adjusted analyses for [index_ma] | 9 | sr_dr__9 | ...a decision rule to handle results arising from period and paired analyses for [index_ma] in crossover trials | 10 | sr_dr__10 | ...a decision rule to handle results arising from multiple information sources (e.g. journal article, trials results register) | 11 | sr_dr__11 | ...a decision rule to handle results arising from overlapping samples of participants (e.g. subgroup of men of all ages and subgroup of older adults which includes men) |
| 1  | sr_dr__1  | ...a decision rule to handle results arising from multiple measurement instruments for [index_ma]                                                                        |                                                                                                                                                                                                                                                                                                                                                                                                                                                                                                                                                                                                                                                                                                                                                                                                                                                                                                                                                                                                                                                                                                                                                                                                                                                                                                                                                                                                                                                                                                                                                                                                                                                                                                                                                                                                                                                                                                       |   |          |                                                                                                   |   |          |                                                                                                           |   |          |                                                                                                       |   |          |                                                                                       |   |          |                                                                                    |   |          |                                                                                                                    |   |          |                                                                                                                                                  |   |          |                                                                                                                     |   |          |                                                                                                                 |    |           |                                                                                                                                |    |           |                                                                                                                                                                          |
| 2  | sr_dr__2  | ...a decision rule to handle results arising from multiple definitions/diagnostic criteria for [index_ma]                                                                |                                                                                                                                                                                                                                                                                                                                                                                                                                                                                                                                                                                                                                                                                                                                                                                                                                                                                                                                                                                                                                                                                                                                                                                                                                                                                                                                                                                                                                                                                                                                                                                                                                                                                                                                                                                                                                                                                                       |   |          |                                                                                                   |   |          |                                                                                                           |   |          |                                                                                                       |   |          |                                                                                       |   |          |                                                                                    |   |          |                                                                                                                    |   |          |                                                                                                                                                  |   |          |                                                                                                                     |   |          |                                                                                                                 |    |           |                                                                                                                                |    |           |                                                                                                                                                                          |
| 3  | sr_dr__3  | ...a decision rule to handle results arising from multiple cut-points on an instrument for [index_ma]                                                                    |                                                                                                                                                                                                                                                                                                                                                                                                                                                                                                                                                                                                                                                                                                                                                                                                                                                                                                                                                                                                                                                                                                                                                                                                                                                                                                                                                                                                                                                                                                                                                                                                                                                                                                                                                                                                                                                                                                       |   |          |                                                                                                   |   |          |                                                                                                           |   |          |                                                                                                       |   |          |                                                                                       |   |          |                                                                                    |   |          |                                                                                                                    |   |          |                                                                                                                                                  |   |          |                                                                                                                     |   |          |                                                                                                                 |    |           |                                                                                                                                |    |           |                                                                                                                                                                          |
| 4  | sr_dr__4  | ...a decision rule to handle results arising from multiple time points for [index_ma]                                                                                    |                                                                                                                                                                                                                                                                                                                                                                                                                                                                                                                                                                                                                                                                                                                                                                                                                                                                                                                                                                                                                                                                                                                                                                                                                                                                                                                                                                                                                                                                                                                                                                                                                                                                                                                                                                                                                                                                                                       |   |          |                                                                                                   |   |          |                                                                                                           |   |          |                                                                                                       |   |          |                                                                                       |   |          |                                                                                    |   |          |                                                                                                                    |   |          |                                                                                                                                                  |   |          |                                                                                                                     |   |          |                                                                                                                 |    |           |                                                                                                                                |    |           |                                                                                                                                                                          |
| 5  | sr_dr__5  | ...a decision rule to handle results arising from multiple interventions/exposures                                                                                       |                                                                                                                                                                                                                                                                                                                                                                                                                                                                                                                                                                                                                                                                                                                                                                                                                                                                                                                                                                                                                                                                                                                                                                                                                                                                                                                                                                                                                                                                                                                                                                                                                                                                                                                                                                                                                                                                                                       |   |          |                                                                                                   |   |          |                                                                                                           |   |          |                                                                                                       |   |          |                                                                                       |   |          |                                                                                    |   |          |                                                                                                                    |   |          |                                                                                                                                                  |   |          |                                                                                                                     |   |          |                                                                                                                 |    |           |                                                                                                                                |    |           |                                                                                                                                                                          |
| 6  | sr_dr__6  | ...a decision rule to handle results arising from both final values and change from baseline values for [index_ma]                                                       |                                                                                                                                                                                                                                                                                                                                                                                                                                                                                                                                                                                                                                                                                                                                                                                                                                                                                                                                                                                                                                                                                                                                                                                                                                                                                                                                                                                                                                                                                                                                                                                                                                                                                                                                                                                                                                                                                                       |   |          |                                                                                                   |   |          |                                                                                                           |   |          |                                                                                                       |   |          |                                                                                       |   |          |                                                                                    |   |          |                                                                                                                    |   |          |                                                                                                                                                  |   |          |                                                                                                                     |   |          |                                                                                                                 |    |           |                                                                                                                                |    |           |                                                                                                                                                                          |
| 7  | sr_dr__7  | ...a decision rule to handle results arising from multiple analysis samples (e.g. intention-to-treat, per-protocol or as-treated) for [index_ma]                         |                                                                                                                                                                                                                                                                                                                                                                                                                                                                                                                                                                                                                                                                                                                                                                                                                                                                                                                                                                                                                                                                                                                                                                                                                                                                                                                                                                                                                                                                                                                                                                                                                                                                                                                                                                                                                                                                                                       |   |          |                                                                                                   |   |          |                                                                                                           |   |          |                                                                                                       |   |          |                                                                                       |   |          |                                                                                    |   |          |                                                                                                                    |   |          |                                                                                                                                                  |   |          |                                                                                                                     |   |          |                                                                                                                 |    |           |                                                                                                                                |    |           |                                                                                                                                                                          |
| 8  | sr_dr__8  | ...a decision rule to handle results arising from multiple unadjusted or covariate-adjusted analyses for [index_ma]                                                      |                                                                                                                                                                                                                                                                                                                                                                                                                                                                                                                                                                                                                                                                                                                                                                                                                                                                                                                                                                                                                                                                                                                                                                                                                                                                                                                                                                                                                                                                                                                                                                                                                                                                                                                                                                                                                                                                                                       |   |          |                                                                                                   |   |          |                                                                                                           |   |          |                                                                                                       |   |          |                                                                                       |   |          |                                                                                    |   |          |                                                                                                                    |   |          |                                                                                                                                                  |   |          |                                                                                                                     |   |          |                                                                                                                 |    |           |                                                                                                                                |    |           |                                                                                                                                                                          |
| 9  | sr_dr__9  | ...a decision rule to handle results arising from period and paired analyses for [index_ma] in crossover trials                                                          |                                                                                                                                                                                                                                                                                                                                                                                                                                                                                                                                                                                                                                                                                                                                                                                                                                                                                                                                                                                                                                                                                                                                                                                                                                                                                                                                                                                                                                                                                                                                                                                                                                                                                                                                                                                                                                                                                                       |   |          |                                                                                                   |   |          |                                                                                                           |   |          |                                                                                                       |   |          |                                                                                       |   |          |                                                                                    |   |          |                                                                                                                    |   |          |                                                                                                                                                  |   |          |                                                                                                                     |   |          |                                                                                                                 |    |           |                                                                                                                                |    |           |                                                                                                                                                                          |
| 10 | sr_dr__10 | ...a decision rule to handle results arising from multiple information sources (e.g. journal article, trials results register)                                           |                                                                                                                                                                                                                                                                                                                                                                                                                                                                                                                                                                                                                                                                                                                                                                                                                                                                                                                                                                                                                                                                                                                                                                                                                                                                                                                                                                                                                                                                                                                                                                                                                                                                                                                                                                                                                                                                                                       |   |          |                                                                                                   |   |          |                                                                                                           |   |          |                                                                                                       |   |          |                                                                                       |   |          |                                                                                    |   |          |                                                                                                                    |   |          |                                                                                                                                                  |   |          |                                                                                                                     |   |          |                                                                                                                 |    |           |                                                                                                                                |    |           |                                                                                                                                                                          |
| 11 | sr_dr__11 | ...a decision rule to handle results arising from overlapping samples of participants (e.g. subgroup of men of all ages and subgroup of older adults which includes men) |                                                                                                                                                                                                                                                                                                                                                                                                                                                                                                                                                                                                                                                                                                                                                                                                                                                                                                                                                                                                                                                                                                                                                                                                                                                                                                                                                                                                                                                                                                                                                                                                                                                                                                                                                                                                                                                                                                       |   |          |                                                                                                   |   |          |                                                                                                           |   |          |                                                                                                       |   |          |                                                                                       |   |          |                                                                                    |   |          |                                                                                                                    |   |          |                                                                                                                                                  |   |          |                                                                                                                     |   |          |                                                                                                                 |    |           |                                                                                                                                |    |           |                                                                                                                                                                          |

|                                                                                                                                                                            |    |                                                                   |                                                                                                                   |       |            |                                                                                  |
|----------------------------------------------------------------------------------------------------------------------------------------------------------------------------|----|-------------------------------------------------------------------|-------------------------------------------------------------------------------------------------------------------|-------|------------|----------------------------------------------------------------------------------|
|                                                                                                                                                                            |    |                                                                   |                                                                                                                   | 12    | sr_dr___12 | ...a decision rule to handle results arising from another source of multiplicity |
| <br>     | 57 | sr_e_scale_txt<br>Show the field ONLY if:<br>[sr_e(1)] = '1'      | Specify the eligible measurement instruments for [index_ma]:                                                      | notes |            |                                                                                  |
| <br>     | 58 | sr_dr_scale_txt<br>Show the field ONLY if:<br>[sr_dr(1)] = '1'    | Specify the decision rule to handle results arising from multiple measurement instruments for [index_ma]:         | notes |            |                                                                                  |
| <br>     | 59 | sr_e_event_txt<br>Show the field ONLY if:<br>[sr_e(2)] = '1'      | Specify the eligible definitions/diagnostic criteria for [index_ma]:                                              | notes |            |                                                                                  |
| <br>     | 60 | sr_dr_event_txt<br>Show the field ONLY if:<br>[sr_dr(2)] = '1'    | Specify the decision rule to handle results arising from multiple definitions/diagnostic criteria for [index_ma]: | notes |            |                                                                                  |
| <br> | 61 | sr_e_cutpoint_txt<br>Show the field ONLY if:<br>[sr_e(3)] = '1'   | Specify the eligible cut-points on an instrument for [index_ma]:                                                  | notes |            |                                                                                  |
| <br> | 62 | sr_dr_cutpoint_txt<br>Show the field ONLY if:<br>[sr_dr(3)] = '1' | Specify the decision rule to handle results arising from multiple cut-points on an                                | notes |            |                                                                                  |

|                                                                                                                                                                            |    |                                                                |                                                                                                                                    |       |
|----------------------------------------------------------------------------------------------------------------------------------------------------------------------------|----|----------------------------------------------------------------|------------------------------------------------------------------------------------------------------------------------------------|-------|
|                                                                                                                                                                            |    |                                                                | instrument for<br>[index_ma]:                                                                                                      |       |
| <br>     | 63 | sr_e_time_txt<br>Show the field ONLY if:<br>[sr_e(4)] = '1'    | Specify the eligible<br>time points for<br>[index_ma]:                                                                             | notes |
| <br>     | 64 | sr_dr_time_txt<br>Show the field ONLY if:<br>[sr_dr(4)] = '1'  | Specify the decision<br>rule to handle results<br>arising from multiple<br>time points for<br>[index_ma]:                          | notes |
| <br>     | 65 | sr_e_group_txt<br>Show the field ONLY if:<br>[sr_e(5)] = '1'   | Specify the eligible<br>interventions/exposures<br>(incl. comparators):                                                            | notes |
| <br>     | 66 | sr_dr_group_txt<br>Show the field ONLY if:<br>[sr_dr(5)] = '1' | Specify the decision<br>rule to handle results<br>arising from multiple<br>interventions/exposures:                                | notes |
| <br>     | 67 | sr_e_fvcs_txt<br>Show the field ONLY if:<br>[sr_e(6)] = '1'    | Specify which values<br>(i.e. final, change from<br>baseline or both) for<br>[index_ma] were<br>eligible:                          | notes |
| <br> | 68 | sr_dr_fvcs_txt<br>Show the field ONLY if:<br>[sr_dr(6)] = '1'  | Specify the decision<br>rule to handle results<br>arising from both final<br>and change from<br>baseline values for<br>[index_ma]: | notes |

|                                                                                                                                                                            |    |                                                                         |                                                                                                                                                     |       |
|----------------------------------------------------------------------------------------------------------------------------------------------------------------------------|----|-------------------------------------------------------------------------|-----------------------------------------------------------------------------------------------------------------------------------------------------|-------|
| <br>     | 69 | sr_e_itt_txt<br>Show the field ONLY if:<br>[ <i>sr_e</i> (7)] = '1'     | Specify which analysis samples (e.g. intention-to-treat, per-protocol) for [ <i>index_ma</i> ] were eligible:                                       | notes |
| <br>     | 70 | sr_dr_itt_txt<br>Show the field ONLY if:<br>[ <i>sr_dr</i> (7)] = '1'   | Specify the decision rule to handle results arising from multiple analysis samples (e.g. intention-to-treat, per-protocol) for [ <i>index_ma</i> ]: | notes |
| <br>     | 71 | sr_e_unadj_txt<br>Show the field ONLY if:<br>[ <i>sr_e</i> (8)] = '1'   | Specify which unadjusted and covariate-adjusted analyses for [ <i>index_ma</i> ] were eligible:                                                     | notes |
| <br>     | 72 | sr_dr_unadj_txt<br>Show the field ONLY if:<br>[ <i>sr_dr</i> (8)] = '1' | Specify the decision rule to handle results arising from multiple unadjusted and covariate-adjusted analyses for [ <i>index_ma</i> ]:               | notes |
| <br> | 73 | sr_e_cross_txt<br>Show the field ONLY if:<br>[ <i>sr_e</i> (9)] = '1'   | Specify which analyses in crossover trials (e.g. first period, second period, paired) were eligible:                                                | notes |

|                                                                                                                                                                            |    |                                                                   |                                                                                                                                        |       |
|----------------------------------------------------------------------------------------------------------------------------------------------------------------------------|----|-------------------------------------------------------------------|----------------------------------------------------------------------------------------------------------------------------------------|-------|
| <br>     | 74 | sr_dr_cross_txt<br>Show the field ONLY if:<br>[sr_dr(9)] = '1'    | Specify the decision rule to handle results arising from period and paired analyses in crossover trials:                               | notes |
| <br>     | 75 | sr_e_source_txt<br>Show the field ONLY if:<br>[sr_e(10)] = '1'    | Specify which information sources (e.g. journal article, trials results register) were eligible:                                       | notes |
| <br>     | 76 | sr_dr_source_txt<br>Show the field ONLY if:<br>[sr_dr(10)] = '1'  | Specify the decision rule to handle results arising from multiple information sources (e.g. journal article, trials results register): | notes |
| <br>     | 77 | sr_dr_overlap_txt<br>Show the field ONLY if:<br>[sr_dr(11)] = '1' | Specify the decision rule to handle results arising from overlapping samples of participants:                                          | notes |
| <br> | 78 | sr_dr_other_txt<br>Show the field ONLY if:<br>[sr_dr(12)] = '1'   | Specify the decision rule(s) to handle results arising from other sources of multiplicity for [index_ma]:                              | notes |
| <br> | 79 | sr_notes                                                          | Notes                                                                                                                                  | notes |

|                                                                                                                                                                            |                              |                                                                                                                    |                                                                                          |                                                                                                                                                                                                                                                                                 |   |            |   |            |   |              |   |                 |   |                              |
|----------------------------------------------------------------------------------------------------------------------------------------------------------------------------|------------------------------|--------------------------------------------------------------------------------------------------------------------|------------------------------------------------------------------------------------------|---------------------------------------------------------------------------------------------------------------------------------------------------------------------------------------------------------------------------------------------------------------------------------|---|------------|---|------------|---|--------------|---|-----------------|---|------------------------------|
|                                                                                                                                                                            | 80                           | sr_characteristics_complete                                                                                        | Section Header: <i>Form Status</i><br>Complete?                                          | dropdown<br><table border="1"> <tr> <td>0</td> <td>Incomplete</td> </tr> <tr> <td>1</td> <td>Unverified</td> </tr> <tr> <td>2</td> <td>Complete</td> </tr> </table>                                                                                                             | 0 | Incomplete | 1 | Unverified | 2 | Complete     |   |                 |   |                              |
| 0                                                                                                                                                                          | Incomplete                   |                                                                                                                    |                                                                                          |                                                                                                                                                                                                                                                                                 |   |            |   |            |   |              |   |                 |   |                              |
| 1                                                                                                                                                                          | Unverified                   |                                                                                                                    |                                                                                          |                                                                                                                                                                                                                                                                                 |   |            |   |            |   |              |   |                 |   |                              |
| 2                                                                                                                                                                          | Complete                     |                                                                                                                    |                                                                                          |                                                                                                                                                                                                                                                                                 |   |            |   |            |   |              |   |                 |   |                              |
| Instrument: <b>Meta-analysis study data</b> (metaanalysis_study_data)                                                                                                      |                              |                                                                                                                    |                                                                                          |                                                                                                                                                                                                                                                                                 |   |            |   |            |   |              |   |                 |   |                              |
| <br>     | 81                           | ma_study_id                                                                                                        | Study ID (record the ID appearing on the forest plot/table for the index meta-analysis): | text                                                                                                                                                                                                                                                                            |   |            |   |            |   |              |   |                 |   |                              |
| <br>     | 82                           | ma_st_measure                                                                                                      | Specify the study effect measure for [index_ma]:                                         | radio<br><table border="1"> <tr> <td>1</td> <td>Risk ratio</td> </tr> <tr> <td>2</td> <td>Odds ratio</td> </tr> <tr> <td>3</td> <td>Hazard ratio</td> </tr> <tr> <td>4</td> <td>Mean difference</td> </tr> <tr> <td>5</td> <td>Standardized mean difference</td> </tr> </table> | 1 | Risk ratio | 2 | Odds ratio | 3 | Hazard ratio | 4 | Mean difference | 5 | Standardized mean difference |
| 1                                                                                                                                                                          | Risk ratio                   |                                                                                                                    |                                                                                          |                                                                                                                                                                                                                                                                                 |   |            |   |            |   |              |   |                 |   |                              |
| 2                                                                                                                                                                          | Odds ratio                   |                                                                                                                    |                                                                                          |                                                                                                                                                                                                                                                                                 |   |            |   |            |   |              |   |                 |   |                              |
| 3                                                                                                                                                                          | Hazard ratio                 |                                                                                                                    |                                                                                          |                                                                                                                                                                                                                                                                                 |   |            |   |            |   |              |   |                 |   |                              |
| 4                                                                                                                                                                          | Mean difference              |                                                                                                                    |                                                                                          |                                                                                                                                                                                                                                                                                 |   |            |   |            |   |              |   |                 |   |                              |
| 5                                                                                                                                                                          | Standardized mean difference |                                                                                                                    |                                                                                          |                                                                                                                                                                                                                                                                                 |   |            |   |            |   |              |   |                 |   |                              |
| <br> | 83                           | ma_st_event1<br>Show the field ONLY if:<br>[ma_st_measure] = '1' or [ma_st_measure] = '2' or [ma_st_measure] = '3' | Number of events in intervention/exposure group (type 'NR' if not reported):             | text                                                                                                                                                                                                                                                                            |   |            |   |            |   |              |   |                 |   |                              |
| <br> | 84                           | ma_st_total1<br>Show the field ONLY if:<br>[ma_st_measure] = '1' or [ma_st_measure] = '2' or [ma_st_measure] = '3' | Sample size of intervention/exposure group (type 'NR' if not reported):                  | text                                                                                                                                                                                                                                                                            |   |            |   |            |   |              |   |                 |   |                              |

|                                                                                                                                                                            |    |                                                                                                                    |                                                                                |      |
|----------------------------------------------------------------------------------------------------------------------------------------------------------------------------|----|--------------------------------------------------------------------------------------------------------------------|--------------------------------------------------------------------------------|------|
| <br>     | 85 | ma_st_event2<br>Show the field ONLY if:<br>[ma_st_measure] = '1' or [ma_st_measure] = '2' or [ma_st_measure] = '3' | Number of events in comparator group (type 'NR' if not reported):              | text |
| <br>     | 86 | ma_st_total2<br>Show the field ONLY if:<br>[ma_st_measure] = '1' or [ma_st_measure] = '2' or [ma_st_measure] = '3' | Sample size of comparator group (type 'NR' if not reported):                   | text |
| <br>     | 87 | ma_st_mean1<br>Show the field ONLY if:<br>[ma_st_measure] = '4' or [ma_st_measure] = '5'                           | Mean of intervention/exposure group (type 'NR' if not reported):               | text |
| <br>     | 88 | ma_st_sd1<br>Show the field ONLY if:<br>[ma_st_measure] = '4' or [ma_st_measure] = '5'                             | Standard deviation of intervention/exposure group (type 'NR' if not reported): | text |
| <br>    | 89 | ma_st_n1<br>Show the field ONLY if:<br>[ma_st_measure] = '4' or [ma_st_measure] = '5'                              | Sample size of intervention/exposure group (type 'NR' if not reported):        | text |
| <br> | 90 | ma_st_mean2<br>Show the field ONLY if:<br>[ma_st_measure] = '4' or [ma_st_measure] = '5'                           | Mean of comparator group (type 'NR' if not reported):                          | text |
| <br> | 91 | ma_st_sd2<br>Show the field ONLY if:                                                                               | Standard deviation of comparator group (type 'NR' if not reported):            | text |



|                                                                                                                                                                            |    |                                                                                       |                                                                                                                     |      |
|----------------------------------------------------------------------------------------------------------------------------------------------------------------------------|----|---------------------------------------------------------------------------------------|---------------------------------------------------------------------------------------------------------------------|------|
|                                                                                                                                                                            |    | [ma_st_measure] = '4' or [ma_st_measure] = '5'                                        |                                                                                                                     |      |
| <br>     | 92 | ma_st_n2<br>Show the field ONLY if:<br>[ma_st_measure] = '4' or [ma_st_measure] = '5' | Sample size of comparator group (type 'NR' if not reported):                                                        | text |
| <br>     | 93 | ma_st_est                                                                             | Study effect estimate (type 'NR' if not reported):                                                                  | text |
| <br>     | 94 | ma_st_seest                                                                           | Standard error of the study effect estimate (type 'NR' if not reported):                                            | text |
| <br>     | 95 | ma_st_lciest                                                                          | Lower 95% confidence interval of the study effect estimate (type 'NR' if not reported):                             | text |
| <br>     | 96 | ma_st_uciest                                                                          | Upper 95% confidence interval of the study effect estimate (type 'NR' if not reported):                             | text |
| <br> | 97 | ma_st_ci_level                                                                        | If the confidence interval (CI) was not a 95% CI, specify the CI level (e.g. 90% CI, 99% CI); otherwise leave blank | text |

|                                                                                                                                                                            |                                                                                                |                 |                                                                                                                                                          |                                                                                                                                                                                                                                                                                                                                                                                                                                                                                                                                                                                                        |   |                                  |   |                    |   |                                                                                                |   |         |
|----------------------------------------------------------------------------------------------------------------------------------------------------------------------------|------------------------------------------------------------------------------------------------|-----------------|----------------------------------------------------------------------------------------------------------------------------------------------------------|--------------------------------------------------------------------------------------------------------------------------------------------------------------------------------------------------------------------------------------------------------------------------------------------------------------------------------------------------------------------------------------------------------------------------------------------------------------------------------------------------------------------------------------------------------------------------------------------------------|---|----------------------------------|---|--------------------|---|------------------------------------------------------------------------------------------------|---|---------|
| <br>     | 98                                                                                             | ma_st_direction | Specify the direction of the study effect estimate (note: ignore the statistical significance of the effect, just focus on the direction):               | radio <table border="1" data-bbox="1064 236 2024 501"> <tr> <td data-bbox="1064 236 1099 293">1</td> <td data-bbox="1099 236 2024 293">Favours intervention or exposure</td> </tr> <tr> <td data-bbox="1064 293 1099 351">2</td> <td data-bbox="1099 293 2024 351">Favours comparator</td> </tr> <tr> <td data-bbox="1064 351 1099 443">3</td> <td data-bbox="1099 351 2024 443">Neutral (e.g. RR is somewhere between 0.95 and 1.05 or MD is somewhere between -0.05 and 0.05)</td> </tr> <tr> <td data-bbox="1064 443 1099 501">4</td> <td data-bbox="1099 443 2024 501">Unclear</td> </tr> </table> | 1 | Favours intervention or exposure | 2 | Favours comparator | 3 | Neutral (e.g. RR is somewhere between 0.95 and 1.05 or MD is somewhere between -0.05 and 0.05) | 4 | Unclear |
| 1                                                                                                                                                                          | Favours intervention or exposure                                                               |                 |                                                                                                                                                          |                                                                                                                                                                                                                                                                                                                                                                                                                                                                                                                                                                                                        |   |                                  |   |                    |   |                                                                                                |   |         |
| 2                                                                                                                                                                          | Favours comparator                                                                             |                 |                                                                                                                                                          |                                                                                                                                                                                                                                                                                                                                                                                                                                                                                                                                                                                                        |   |                                  |   |                    |   |                                                                                                |   |         |
| 3                                                                                                                                                                          | Neutral (e.g. RR is somewhere between 0.95 and 1.05 or MD is somewhere between -0.05 and 0.05) |                 |                                                                                                                                                          |                                                                                                                                                                                                                                                                                                                                                                                                                                                                                                                                                                                                        |   |                                  |   |                    |   |                                                                                                |   |         |
| 4                                                                                                                                                                          | Unclear                                                                                        |                 |                                                                                                                                                          |                                                                                                                                                                                                                                                                                                                                                                                                                                                                                                                                                                                                        |   |                                  |   |                    |   |                                                                                                |   |         |
| <br>     | 99                                                                                             | ma_st_retrieve  | Did the review authors state that data for this particular result were retrieved from study authors?                                                     | yesno <table border="1" data-bbox="1064 550 1169 663"> <tr> <td data-bbox="1064 550 1099 608">1</td> <td data-bbox="1099 550 1169 608">Yes</td> </tr> <tr> <td data-bbox="1064 608 1099 663">0</td> <td data-bbox="1099 608 1169 663">No</td> </tr> </table>                                                                                                                                                                                                                                                                                                                                           | 1 | Yes                              | 0 | No                 |   |                                                                                                |   |         |
| 1                                                                                                                                                                          | Yes                                                                                            |                 |                                                                                                                                                          |                                                                                                                                                                                                                                                                                                                                                                                                                                                                                                                                                                                                        |   |                                  |   |                    |   |                                                                                                |   |         |
| 0                                                                                                                                                                          | No                                                                                             |                 |                                                                                                                                                          |                                                                                                                                                                                                                                                                                                                                                                                                                                                                                                                                                                                                        |   |                                  |   |                    |   |                                                                                                |   |         |
| <br>     | 100                                                                                            | ma_st_manip     | Did the review authors state that data for this particular result required algebraic transformation to include in meta-analysis (e.g. convert SE to SD)? | yesno <table border="1" data-bbox="1064 753 1169 866"> <tr> <td data-bbox="1064 753 1099 810">1</td> <td data-bbox="1099 753 1169 810">Yes</td> </tr> <tr> <td data-bbox="1064 810 1099 866">0</td> <td data-bbox="1099 810 1169 866">No</td> </tr> </table>                                                                                                                                                                                                                                                                                                                                           | 1 | Yes                              | 0 | No                 |   |                                                                                                |   |         |
| 1                                                                                                                                                                          | Yes                                                                                            |                 |                                                                                                                                                          |                                                                                                                                                                                                                                                                                                                                                                                                                                                                                                                                                                                                        |   |                                  |   |                    |   |                                                                                                |   |         |
| 0                                                                                                                                                                          | No                                                                                             |                 |                                                                                                                                                          |                                                                                                                                                                                                                                                                                                                                                                                                                                                                                                                                                                                                        |   |                                  |   |                    |   |                                                                                                |   |         |
| <br>  | 101                                                                                            | ma_st_transl    | Did the review authors state that data for this particular result originated from a report translated into English?                                      | yesno <table border="1" data-bbox="1064 1029 1169 1142"> <tr> <td data-bbox="1064 1029 1099 1086">1</td> <td data-bbox="1099 1029 1169 1086">Yes</td> </tr> <tr> <td data-bbox="1064 1086 1099 1142">0</td> <td data-bbox="1099 1086 1169 1142">No</td> </tr> </table>                                                                                                                                                                                                                                                                                                                                 | 1 | Yes                              | 0 | No                 |   |                                                                                                |   |         |
| 1                                                                                                                                                                          | Yes                                                                                            |                 |                                                                                                                                                          |                                                                                                                                                                                                                                                                                                                                                                                                                                                                                                                                                                                                        |   |                                  |   |                    |   |                                                                                                |   |         |
| 0                                                                                                                                                                          | No                                                                                             |                 |                                                                                                                                                          |                                                                                                                                                                                                                                                                                                                                                                                                                                                                                                                                                                                                        |   |                                  |   |                    |   |                                                                                                |   |         |
| <br> | 102                                                                                            | ma_st_impute    | Did the review authors state that data for this particular result was included in the meta-                                                              | yesno <table border="1" data-bbox="1064 1232 1169 1345"> <tr> <td data-bbox="1064 1232 1099 1289">1</td> <td data-bbox="1099 1232 1169 1289">Yes</td> </tr> <tr> <td data-bbox="1064 1289 1099 1345">0</td> <td data-bbox="1099 1289 1169 1345">No</td> </tr> </table>                                                                                                                                                                                                                                                                                                                                 | 1 | Yes                              | 0 | No                 |   |                                                                                                |   |         |
| 1                                                                                                                                                                          | Yes                                                                                            |                 |                                                                                                                                                          |                                                                                                                                                                                                                                                                                                                                                                                                                                                                                                                                                                                                        |   |                                  |   |                    |   |                                                                                                |   |         |
| 0                                                                                                                                                                          | No                                                                                             |                 |                                                                                                                                                          |                                                                                                                                                                                                                                                                                                                                                                                                                                                                                                                                                                                                        |   |                                  |   |                    |   |                                                                                                |   |         |

|                                                                                                                                                                            |                              |                                                                     |                                                                                  |                                                                                                                                                                                                                                                                                 |   |            |   |            |   |              |   |                 |   |                              |
|----------------------------------------------------------------------------------------------------------------------------------------------------------------------------|------------------------------|---------------------------------------------------------------------|----------------------------------------------------------------------------------|---------------------------------------------------------------------------------------------------------------------------------------------------------------------------------------------------------------------------------------------------------------------------------|---|------------|---|------------|---|--------------|---|-----------------|---|------------------------------|
|                                                                                                                                                                            |                              |                                                                     | analysis by using a method of imputation?                                        |                                                                                                                                                                                                                                                                                 |   |            |   |            |   |              |   |                 |   |                              |
| <br>     | 103                          | ma_st_impute_txt<br>Show the field ONLY if:<br>[ma_st_impute] = '1' | Specify the method of imputation:                                                | text                                                                                                                                                                                                                                                                            |   |            |   |            |   |              |   |                 |   |                              |
| <br>     | 104                          | ma_st_notes                                                         | Notes                                                                            | notes                                                                                                                                                                                                                                                                           |   |            |   |            |   |              |   |                 |   |                              |
|                                                                                                                                                                            | 105                          | metaanalysis_study_data_complete                                    | Section Header: <i>Form Status</i><br>Complete?                                  | dropdown<br><table border="1"> <tr> <td>0</td> <td>Incomplete</td> </tr> <tr> <td>1</td> <td>Unverified</td> </tr> <tr> <td>2</td> <td>Complete</td> </tr> </table>                                                                                                             | 0 | Incomplete | 1 | Unverified | 2 | Complete     |   |                 |   |                              |
| 0                                                                                                                                                                          | Incomplete                   |                                                                     |                                                                                  |                                                                                                                                                                                                                                                                                 |   |            |   |            |   |              |   |                 |   |                              |
| 1                                                                                                                                                                          | Unverified                   |                                                                     |                                                                                  |                                                                                                                                                                                                                                                                                 |   |            |   |            |   |              |   |                 |   |                              |
| 2                                                                                                                                                                          | Complete                     |                                                                     |                                                                                  |                                                                                                                                                                                                                                                                                 |   |            |   |            |   |              |   |                 |   |                              |
| Instrument: <b>Meta-analytic effect</b> (metaanalytic_effect)                                                                                                              |                              |                                                                     |                                                                                  |                                                                                                                                                                                                                                                                                 |   |            |   |            |   |              |   |                 |   |                              |
| <br>     | 106                          | ma_measure                                                          | Specify the meta-analytic effect measure for [index_ma]:                         | radio<br><table border="1"> <tr> <td>1</td> <td>Risk ratio</td> </tr> <tr> <td>2</td> <td>Odds ratio</td> </tr> <tr> <td>3</td> <td>Hazard ratio</td> </tr> <tr> <td>4</td> <td>Mean difference</td> </tr> <tr> <td>5</td> <td>Standardized mean difference</td> </tr> </table> | 1 | Risk ratio | 2 | Odds ratio | 3 | Hazard ratio | 4 | Mean difference | 5 | Standardized mean difference |
| 1                                                                                                                                                                          | Risk ratio                   |                                                                     |                                                                                  |                                                                                                                                                                                                                                                                                 |   |            |   |            |   |              |   |                 |   |                              |
| 2                                                                                                                                                                          | Odds ratio                   |                                                                     |                                                                                  |                                                                                                                                                                                                                                                                                 |   |            |   |            |   |              |   |                 |   |                              |
| 3                                                                                                                                                                          | Hazard ratio                 |                                                                     |                                                                                  |                                                                                                                                                                                                                                                                                 |   |            |   |            |   |              |   |                 |   |                              |
| 4                                                                                                                                                                          | Mean difference              |                                                                     |                                                                                  |                                                                                                                                                                                                                                                                                 |   |            |   |            |   |              |   |                 |   |                              |
| 5                                                                                                                                                                          | Standardized mean difference |                                                                     |                                                                                  |                                                                                                                                                                                                                                                                                 |   |            |   |            |   |              |   |                 |   |                              |
| <br> | 107                          | ma_est                                                              | Meta-analytic effect estimate:                                                   | text                                                                                                                                                                                                                                                                            |   |            |   |            |   |              |   |                 |   |                              |
| <br> | 108                          | ma_seest                                                            | Standard error of the meta-analytic effect estimate (type 'NR' if not reported): | text                                                                                                                                                                                                                                                                            |   |            |   |            |   |              |   |                 |   |                              |

|                                                                                                                                                                            |                                                                                                |              |                                                                                                                                                    |                                                                                                                                                                                                                                                                                                                    |   |                                  |   |                    |   |                                                                                                |   |         |
|----------------------------------------------------------------------------------------------------------------------------------------------------------------------------|------------------------------------------------------------------------------------------------|--------------|----------------------------------------------------------------------------------------------------------------------------------------------------|--------------------------------------------------------------------------------------------------------------------------------------------------------------------------------------------------------------------------------------------------------------------------------------------------------------------|---|----------------------------------|---|--------------------|---|------------------------------------------------------------------------------------------------|---|---------|
| <br>     | 109                                                                                            | ma_lciest    | Lower 95% confidence interval of the meta-analytic effect estimate (type 'NR' if not reported):                                                    | text                                                                                                                                                                                                                                                                                                               |   |                                  |   |                    |   |                                                                                                |   |         |
| <br>     | 110                                                                                            | ma_uciest    | Upper 95% confidence interval of the meta-analytic effect estimate (type 'NR' if not reported):                                                    | text                                                                                                                                                                                                                                                                                                               |   |                                  |   |                    |   |                                                                                                |   |         |
| <br>     | 111                                                                                            | ma_ci_level  | If the confidence interval (CI) was not a 95% CI, specify the CI level (e.g. 90% CI, 99% CI); otherwise leave blank                                | text                                                                                                                                                                                                                                                                                                               |   |                                  |   |                    |   |                                                                                                |   |         |
| <br>     | 112                                                                                            | ma_direction | Specify the direction of the meta-analytic effect estimate (note: ignore the statistical significance of the effect, just focus on the direction): | <table border="1"> <tr> <td>1</td> <td>Favours intervention or exposure</td> </tr> <tr> <td>2</td> <td>Favours comparator</td> </tr> <tr> <td>3</td> <td>Neutral (e.g. RR is somewhere between 0.95 and 1.05 or MD is somewhere between -0.05 and 0.05)</td> </tr> <tr> <td>4</td> <td>Unclear</td> </tr> </table> | 1 | Favours intervention or exposure | 2 | Favours comparator | 3 | Neutral (e.g. RR is somewhere between 0.95 and 1.05 or MD is somewhere between -0.05 and 0.05) | 4 | Unclear |
| 1                                                                                                                                                                          | Favours intervention or exposure                                                               |              |                                                                                                                                                    |                                                                                                                                                                                                                                                                                                                    |   |                                  |   |                    |   |                                                                                                |   |         |
| 2                                                                                                                                                                          | Favours comparator                                                                             |              |                                                                                                                                                    |                                                                                                                                                                                                                                                                                                                    |   |                                  |   |                    |   |                                                                                                |   |         |
| 3                                                                                                                                                                          | Neutral (e.g. RR is somewhere between 0.95 and 1.05 or MD is somewhere between -0.05 and 0.05) |              |                                                                                                                                                    |                                                                                                                                                                                                                                                                                                                    |   |                                  |   |                    |   |                                                                                                |   |         |
| 4                                                                                                                                                                          | Unclear                                                                                        |              |                                                                                                                                                    |                                                                                                                                                                                                                                                                                                                    |   |                                  |   |                    |   |                                                                                                |   |         |
| <br> | 113                                                                                            | ma_location  | Specify the location of the meta-analysis in the article (e.g. Figure 1, Supp Table 2):                                                            | text                                                                                                                                                                                                                                                                                                               |   |                                  |   |                    |   |                                                                                                |   |         |

|                                                                                                                                                                            |                                                                                                   |                                                                                                                                                  |                                                                                                          |                                                                                                                                                                                                                                                                                                                                                                                                                                                                                                                                                                                                                                                                                                                                                                                                                                                                            |   |                                                                                            |   |                                                                                           |   |                                                                                                   |   |         |   |                                      |
|----------------------------------------------------------------------------------------------------------------------------------------------------------------------------|---------------------------------------------------------------------------------------------------|--------------------------------------------------------------------------------------------------------------------------------------------------|----------------------------------------------------------------------------------------------------------|----------------------------------------------------------------------------------------------------------------------------------------------------------------------------------------------------------------------------------------------------------------------------------------------------------------------------------------------------------------------------------------------------------------------------------------------------------------------------------------------------------------------------------------------------------------------------------------------------------------------------------------------------------------------------------------------------------------------------------------------------------------------------------------------------------------------------------------------------------------------------|---|--------------------------------------------------------------------------------------------|---|-------------------------------------------------------------------------------------------|---|---------------------------------------------------------------------------------------------------|---|---------|---|--------------------------------------|
| <br>     | 114                                                                                               | ma_conclusion                                                                                                                                    | What type of conclusion did the authors draw about the intervention/exposure with regards to [index_ma]? | radio <table border="1" data-bbox="1064 239 2024 628"> <tr> <td data-bbox="1064 239 1099 331">1</td> <td data-bbox="1099 239 2024 331">Favourable (e.g. stated that the food/diet had a beneficial/positive effect on [index_ma])</td> </tr> <tr> <td data-bbox="1064 331 1099 424">2</td> <td data-bbox="1099 331 2024 424">Unfavourable (e.g. stated that the food/diet had a harmful/negative effect on [index_ma])</td> </tr> <tr> <td data-bbox="1064 424 1099 517">3</td> <td data-bbox="1099 424 2024 517">Neutral (e.g. stated that the food/diet had neither a beneficial or harmful effect on [index_ma])</td> </tr> <tr> <td data-bbox="1064 517 1099 571">4</td> <td data-bbox="1099 517 2024 571">Unclear</td> </tr> <tr> <td data-bbox="1064 571 1099 628">5</td> <td data-bbox="1099 571 2024 628">No conclusion about [index_ma] drawn</td> </tr> </table> | 1 | Favourable (e.g. stated that the food/diet had a beneficial/positive effect on [index_ma]) | 2 | Unfavourable (e.g. stated that the food/diet had a harmful/negative effect on [index_ma]) | 3 | Neutral (e.g. stated that the food/diet had neither a beneficial or harmful effect on [index_ma]) | 4 | Unclear | 5 | No conclusion about [index_ma] drawn |
| 1                                                                                                                                                                          | Favourable (e.g. stated that the food/diet had a beneficial/positive effect on [index_ma])        |                                                                                                                                                  |                                                                                                          |                                                                                                                                                                                                                                                                                                                                                                                                                                                                                                                                                                                                                                                                                                                                                                                                                                                                            |   |                                                                                            |   |                                                                                           |   |                                                                                                   |   |         |   |                                      |
| 2                                                                                                                                                                          | Unfavourable (e.g. stated that the food/diet had a harmful/negative effect on [index_ma])         |                                                                                                                                                  |                                                                                                          |                                                                                                                                                                                                                                                                                                                                                                                                                                                                                                                                                                                                                                                                                                                                                                                                                                                                            |   |                                                                                            |   |                                                                                           |   |                                                                                                   |   |         |   |                                      |
| 3                                                                                                                                                                          | Neutral (e.g. stated that the food/diet had neither a beneficial or harmful effect on [index_ma]) |                                                                                                                                                  |                                                                                                          |                                                                                                                                                                                                                                                                                                                                                                                                                                                                                                                                                                                                                                                                                                                                                                                                                                                                            |   |                                                                                            |   |                                                                                           |   |                                                                                                   |   |         |   |                                      |
| 4                                                                                                                                                                          | Unclear                                                                                           |                                                                                                                                                  |                                                                                                          |                                                                                                                                                                                                                                                                                                                                                                                                                                                                                                                                                                                                                                                                                                                                                                                                                                                                            |   |                                                                                            |   |                                                                                           |   |                                                                                                   |   |         |   |                                      |
| 5                                                                                                                                                                          | No conclusion about [index_ma] drawn                                                              |                                                                                                                                                  |                                                                                                          |                                                                                                                                                                                                                                                                                                                                                                                                                                                                                                                                                                                                                                                                                                                                                                                                                                                                            |   |                                                                                            |   |                                                                                           |   |                                                                                                   |   |         |   |                                      |
| <br>     | 115                                                                                               | ma_conclusion_ab_txt<br>Show the field ONLY if: [ma_conclusion] = '1' or [ma_conclusion] = '2' or [ma_conclusion] = '3' or [ma_conclusion] = '5' | Extract verbatim the conclusion reported in the abstract:                                                | notes                                                                                                                                                                                                                                                                                                                                                                                                                                                                                                                                                                                                                                                                                                                                                                                                                                                                      |   |                                                                                            |   |                                                                                           |   |                                                                                                   |   |         |   |                                      |
| <br>     | 116                                                                                               | ma_conclusion_txt<br>Show the field ONLY if: [ma_conclusion] = '1' or [ma_conclusion] = '2' or [ma_conclusion] = '3' or [ma_conclusion] = '4'    | Extract verbatim the conclusion reported in the main text:                                               | notes                                                                                                                                                                                                                                                                                                                                                                                                                                                                                                                                                                                                                                                                                                                                                                                                                                                                      |   |                                                                                            |   |                                                                                           |   |                                                                                                   |   |         |   |                                      |
| <br> | 117                                                                                               | ma_notes                                                                                                                                         | Notes                                                                                                    | notes                                                                                                                                                                                                                                                                                                                                                                                                                                                                                                                                                                                                                                                                                                                                                                                                                                                                      |   |                                                                                            |   |                                                                                           |   |                                                                                                   |   |         |   |                                      |
|                                                                                                                                                                            | 118                                                                                               | metaanalytic_effect_complete                                                                                                                     | Section Header: <i>Form Status</i><br>Complete?                                                          | dropdown <table border="1" data-bbox="1064 1252 1263 1362"> <tr> <td data-bbox="1064 1252 1099 1310">0</td> <td data-bbox="1099 1252 1263 1310">Incomplete</td> </tr> <tr> <td data-bbox="1064 1310 1099 1362">1</td> <td data-bbox="1099 1310 1263 1362">Unverified</td> </tr> </table>                                                                                                                                                                                                                                                                                                                                                                                                                                                                                                                                                                                   | 0 | Incomplete                                                                                 | 1 | Unverified                                                                                |   |                                                                                                   |   |         |   |                                      |
| 0                                                                                                                                                                          | Incomplete                                                                                        |                                                                                                                                                  |                                                                                                          |                                                                                                                                                                                                                                                                                                                                                                                                                                                                                                                                                                                                                                                                                                                                                                                                                                                                            |   |                                                                                            |   |                                                                                           |   |                                                                                                   |   |         |   |                                      |
| 1                                                                                                                                                                          | Unverified                                                                                        |                                                                                                                                                  |                                                                                                          |                                                                                                                                                                                                                                                                                                                                                                                                                                                                                                                                                                                                                                                                                                                                                                                                                                                                            |   |                                                                                            |   |                                                                                           |   |                                                                                                   |   |         |   |                                      |

|                                                                                                                                                                         |                              |                                                             |                                                                                                                                     |                                                                                                                                                                                                                                                                                                                                                                           |   |            |   |            |   |              |   |            |   |                  |   |                 |   |                              |
|-------------------------------------------------------------------------------------------------------------------------------------------------------------------------|------------------------------|-------------------------------------------------------------|-------------------------------------------------------------------------------------------------------------------------------------|---------------------------------------------------------------------------------------------------------------------------------------------------------------------------------------------------------------------------------------------------------------------------------------------------------------------------------------------------------------------------|---|------------|---|------------|---|--------------|---|------------|---|------------------|---|-----------------|---|------------------------------|
|                                                                                                                                                                         |                              |                                                             |                                                                                                                                     | 2 Complete                                                                                                                                                                                                                                                                                                                                                                |   |            |   |            |   |              |   |            |   |                  |   |                 |   |                              |
| Instrument: <b>Study data</b> (study_data)                                                                                                                              |                              |                                                             |                                                                                                                                     |                                                                                                                                                                                                                                                                                                                                                                           |   |            |   |            |   |              |   |            |   |                  |   |                 |   |                              |
| <br>  | 119                          | study_id                                                    | Study ID (record the ID in the filename of the PDF):                                                                                | text                                                                                                                                                                                                                                                                                                                                                                      |   |            |   |            |   |              |   |            |   |                  |   |                 |   |                              |
| <br>  | 120                          | st_data_avail                                               | Was there enough data available in the paper to extract or calculate a result compatible with the index meta-analysis ([index_ma])? | yesno<br><table border="1"> <tr> <td>1</td> <td>Yes</td> </tr> <tr> <td>0</td> <td>No</td> </tr> </table>                                                                                                                                                                                                                                                                 | 1 | Yes        | 0 | No         |   |              |   |            |   |                  |   |                 |   |                              |
| 1                                                                                                                                                                       | Yes                          |                                                             |                                                                                                                                     |                                                                                                                                                                                                                                                                                                                                                                           |   |            |   |            |   |              |   |            |   |                  |   |                 |   |                              |
| 0                                                                                                                                                                       | No                           |                                                             |                                                                                                                                     |                                                                                                                                                                                                                                                                                                                                                                           |   |            |   |            |   |              |   |            |   |                  |   |                 |   |                              |
| <br>  | 121                          | st_design<br>Show the field ONLY if: [st_data_avail] = '1'  | Indicate the design of the study (e.g. parallel-group randomized trial, crossover trial, cohort study, case-control study):         | text                                                                                                                                                                                                                                                                                                                                                                      |   |            |   |            |   |              |   |            |   |                  |   |                 |   |                              |
| <br> | 122                          | st_measure<br>Show the field ONLY if: [st_data_avail] = '1' | Specify the study effect measure for a result compatible with the index meta-analysis ([index_ma]):                                 | radio<br><table border="1"> <tr> <td>0</td> <td>Risk ratio</td> </tr> <tr> <td>1</td> <td>Odds ratio</td> </tr> <tr> <td>2</td> <td>Hazard ratio</td> </tr> <tr> <td>3</td> <td>Rate ratio</td> </tr> <tr> <td>4</td> <td>Prevalence ratio</td> </tr> <tr> <td>5</td> <td>Mean difference</td> </tr> <tr> <td>6</td> <td>Standardized mean difference</td> </tr> </table> | 0 | Risk ratio | 1 | Odds ratio | 2 | Hazard ratio | 3 | Rate ratio | 4 | Prevalence ratio | 5 | Mean difference | 6 | Standardized mean difference |
| 0                                                                                                                                                                       | Risk ratio                   |                                                             |                                                                                                                                     |                                                                                                                                                                                                                                                                                                                                                                           |   |            |   |            |   |              |   |            |   |                  |   |                 |   |                              |
| 1                                                                                                                                                                       | Odds ratio                   |                                                             |                                                                                                                                     |                                                                                                                                                                                                                                                                                                                                                                           |   |            |   |            |   |              |   |            |   |                  |   |                 |   |                              |
| 2                                                                                                                                                                       | Hazard ratio                 |                                                             |                                                                                                                                     |                                                                                                                                                                                                                                                                                                                                                                           |   |            |   |            |   |              |   |            |   |                  |   |                 |   |                              |
| 3                                                                                                                                                                       | Rate ratio                   |                                                             |                                                                                                                                     |                                                                                                                                                                                                                                                                                                                                                                           |   |            |   |            |   |              |   |            |   |                  |   |                 |   |                              |
| 4                                                                                                                                                                       | Prevalence ratio             |                                                             |                                                                                                                                     |                                                                                                                                                                                                                                                                                                                                                                           |   |            |   |            |   |              |   |            |   |                  |   |                 |   |                              |
| 5                                                                                                                                                                       | Mean difference              |                                                             |                                                                                                                                     |                                                                                                                                                                                                                                                                                                                                                                           |   |            |   |            |   |              |   |            |   |                  |   |                 |   |                              |
| 6                                                                                                                                                                       | Standardized mean difference |                                                             |                                                                                                                                     |                                                                                                                                                                                                                                                                                                                                                                           |   |            |   |            |   |              |   |            |   |                  |   |                 |   |                              |

|                                                                                                                                                                            |                          |                                                                                                                                                              |                                                                                                     |                                                                                                                                                                                                                                                                                                                                                                                                                                                                                                                             |   |                          |   |              |   |              |   |            |
|----------------------------------------------------------------------------------------------------------------------------------------------------------------------------|--------------------------|--------------------------------------------------------------------------------------------------------------------------------------------------------------|-----------------------------------------------------------------------------------------------------|-----------------------------------------------------------------------------------------------------------------------------------------------------------------------------------------------------------------------------------------------------------------------------------------------------------------------------------------------------------------------------------------------------------------------------------------------------------------------------------------------------------------------------|---|--------------------------|---|--------------|---|--------------|---|------------|
| <br>     | 123                      | <b>st_def_event</b><br>Show the field ONLY if:<br>[st_measure] = '0' or [st_measure] = '1' or [st_measure] = '2' or [st_measure] = '3' or [st_measure] = '4' | Specify the definition/diagnostic criteria for the event (type 'NR' if not reported):               | text                                                                                                                                                                                                                                                                                                                                                                                                                                                                                                                        |   |                          |   |              |   |              |   |            |
| <br>     | 124                      | <b>st_scale</b><br>Show the field ONLY if:<br>[st_measure] = '5' or [st_measure] = '6'                                                                       | Specify the outcome measurement instrument used to generate the result (type 'NR' if not reported): | text                                                                                                                                                                                                                                                                                                                                                                                                                                                                                                                        |   |                          |   |              |   |              |   |            |
| <br>     | 125                      | <b>st_intervention</b><br>Show the field ONLY if:<br>[st_data_avail] = '1'                                                                                   | Specify the intervention/exposure (e.g. 'red meat 3 times a week'):                                 | text                                                                                                                                                                                                                                                                                                                                                                                                                                                                                                                        |   |                          |   |              |   |              |   |            |
| <br>     | 126                      | <b>st_comparator</b><br>Show the field ONLY if:<br>[st_data_avail] = '1'                                                                                     | Specify the comparator (e.g. 'red meat once a month'):                                              | text                                                                                                                                                                                                                                                                                                                                                                                                                                                                                                                        |   |                          |   |              |   |              |   |            |
| <br>  | 127                      | <b>st_time</b><br>Show the field ONLY if:<br>[st_data_avail] = '1'                                                                                           | Specify the time point for the result (e.g. 6 weeks; type 'NR' if not reported):                    | text                                                                                                                                                                                                                                                                                                                                                                                                                                                                                                                        |   |                          |   |              |   |              |   |            |
| <br> | 128                      | <b>st_itt</b><br>Show the field ONLY if:<br>[st_data_avail] = '1'                                                                                            | Specify the analysis sample for the result (type 'NR' if not reported):                             | radio <table border="1" data-bbox="1064 1145 1417 1361"> <tr> <td data-bbox="1064 1145 1099 1201">1</td> <td data-bbox="1099 1145 1417 1201">Intention-to-treat (ITT)</td> </tr> <tr> <td data-bbox="1064 1201 1099 1257">2</td> <td data-bbox="1099 1201 1417 1257">Modified ITT</td> </tr> <tr> <td data-bbox="1064 1257 1099 1313">3</td> <td data-bbox="1099 1257 1417 1313">Per-protocol</td> </tr> <tr> <td data-bbox="1064 1313 1099 1361">4</td> <td data-bbox="1099 1313 1417 1361">As-treated</td> </tr> </table> | 1 | Intention-to-treat (ITT) | 2 | Modified ITT | 3 | Per-protocol | 4 | As-treated |
| 1                                                                                                                                                                          | Intention-to-treat (ITT) |                                                                                                                                                              |                                                                                                     |                                                                                                                                                                                                                                                                                                                                                                                                                                                                                                                             |   |                          |   |              |   |              |   |            |
| 2                                                                                                                                                                          | Modified ITT             |                                                                                                                                                              |                                                                                                     |                                                                                                                                                                                                                                                                                                                                                                                                                                                                                                                             |   |                          |   |              |   |              |   |            |
| 3                                                                                                                                                                          | Per-protocol             |                                                                                                                                                              |                                                                                                     |                                                                                                                                                                                                                                                                                                                                                                                                                                                                                                                             |   |                          |   |              |   |              |   |            |
| 4                                                                                                                                                                          | As-treated               |                                                                                                                                                              |                                                                                                     |                                                                                                                                                                                                                                                                                                                                                                                                                                                                                                                             |   |                          |   |              |   |              |   |            |

|                                                                                                                                                                         |            |                                                                                                                                                    |                                                                                                                                 |                                                                                                                                                            |   |            |   |          |   |         |
|-------------------------------------------------------------------------------------------------------------------------------------------------------------------------|------------|----------------------------------------------------------------------------------------------------------------------------------------------------|---------------------------------------------------------------------------------------------------------------------------------|------------------------------------------------------------------------------------------------------------------------------------------------------------|---|------------|---|----------|---|---------|
|                                                                                                                                                                         |            |                                                                                                                                                    |                                                                                                                                 | <table border="1"> <tr> <td>5</td> <td>Other</td> </tr> <tr> <td>6</td> <td>Unclear</td> </tr> </table>                                                    | 5 | Other      | 6 | Unclear  |   |         |
| 5                                                                                                                                                                       | Other      |                                                                                                                                                    |                                                                                                                                 |                                                                                                                                                            |   |            |   |          |   |         |
| 6                                                                                                                                                                       | Unclear    |                                                                                                                                                    |                                                                                                                                 |                                                                                                                                                            |   |            |   |          |   |         |
|       | 129        | st_unadj<br>Show the field ONLY if:<br>[st_data_avail] = '1'                                                                                       | Was the result unadjusted or adjusted for covariates?                                                                           | radio <table border="1"> <tr> <td>1</td> <td>Unadjusted</td> </tr> <tr> <td>2</td> <td>Adjusted</td> </tr> <tr> <td>3</td> <td>Unclear</td> </tr> </table> | 1 | Unadjusted | 2 | Adjusted | 3 | Unclear |
| 1                                                                                                                                                                       | Unadjusted |                                                                                                                                                    |                                                                                                                                 |                                                                                                                                                            |   |            |   |          |   |         |
| 2                                                                                                                                                                       | Adjusted   |                                                                                                                                                    |                                                                                                                                 |                                                                                                                                                            |   |            |   |          |   |         |
| 3                                                                                                                                                                       | Unclear    |                                                                                                                                                    |                                                                                                                                 |                                                                                                                                                            |   |            |   |          |   |         |
|       | 130        | st_covar<br>Show the field ONLY if:<br>[st_unadj] = '2'                                                                                            | Which covariates were included in the model?                                                                                    | text                                                                                                                                                       |   |            |   |          |   |         |
|       | 131        | st_other_id<br>Show the field ONLY if:<br>[st_data_avail] = '1'                                                                                    | Specify any other identifying characteristic of the result, e.g. 'subgroup analysis of men only' (type 'NA' if not applicable): | text                                                                                                                                                       |   |            |   |          |   |         |
|     | 132        | st_event1<br>Show the field ONLY if:<br>[st_measure] = '0' or [st_measure] = '1' or [st_measure] = '2' or [st_measure] = '3' or [st_measure] = '4' | Number of events in intervention/exposure group (type 'NR' if not reported):                                                    | text                                                                                                                                                       |   |            |   |          |   |         |
|   | 133        | st_total1<br>Show the field ONLY if:<br>[st_measure] = '0' or [st_measure] = '1' or [st_measure] = '2'                                             | Sample size of intervention/exposure group (type 'NR' if not reported):                                                         | text                                                                                                                                                       |   |            |   |          |   |         |



|                                                                                                                                                                            |                             |                                                                                                                                                    |                                                                   |                                                                                                                                                                                                                  |   |              |   |                             |   |         |
|----------------------------------------------------------------------------------------------------------------------------------------------------------------------------|-----------------------------|----------------------------------------------------------------------------------------------------------------------------------------------------|-------------------------------------------------------------------|------------------------------------------------------------------------------------------------------------------------------------------------------------------------------------------------------------------|---|--------------|---|-----------------------------|---|---------|
|                                                                                                                                                                            |                             | or [st_measure] = '3' or [st_measure] = '4'                                                                                                        |                                                                   |                                                                                                                                                                                                                  |   |              |   |                             |   |         |
| <br>     | 134                         | st_event2<br>Show the field ONLY if:<br>[st_measure] = '0' or [st_measure] = '1' or [st_measure] = '2' or [st_measure] = '3' or [st_measure] = '4' | Number of events in comparator group (type 'NR' if not reported): | text                                                                                                                                                                                                             |   |              |   |                             |   |         |
| <br>     | 135                         | st_total2<br>Show the field ONLY if:<br>[st_measure] = '0' or [st_measure] = '1' or [st_measure] = '2' or [st_measure] = '3' or [st_measure] = '4' | Sample size of comparator group (type 'NR' if not reported):      | text                                                                                                                                                                                                             |   |              |   |                             |   |         |
| <br>     | 136                         | st_fvcs<br>Show the field ONLY if:<br>[st_measure] = '5' or [st_measure] = '6'                                                                     | Which values were used to calculate means?                        | radio<br><table border="1" data-bbox="1064 810 1489 976"> <tr> <td>1</td> <td>Final values</td> </tr> <tr> <td>2</td> <td>Change from baseline values</td> </tr> <tr> <td>3</td> <td>Unclear</td> </tr> </table> | 1 | Final values | 2 | Change from baseline values | 3 | Unclear |
| 1                                                                                                                                                                          | Final values                |                                                                                                                                                    |                                                                   |                                                                                                                                                                                                                  |   |              |   |                             |   |         |
| 2                                                                                                                                                                          | Change from baseline values |                                                                                                                                                    |                                                                   |                                                                                                                                                                                                                  |   |              |   |                             |   |         |
| 3                                                                                                                                                                          | Unclear                     |                                                                                                                                                    |                                                                   |                                                                                                                                                                                                                  |   |              |   |                             |   |         |
| <br> | 137                         | st_meansd<br>Show the field ONLY if:<br>[st_measure] = '5' or [st_measure] = '6'                                                                   | Were means and standard deviations reported for each group?       | yesno<br><table border="1" data-bbox="1064 1034 1169 1145"> <tr> <td>1</td> <td>Yes</td> </tr> <tr> <td>0</td> <td>No</td> </tr> </table>                                                                        | 1 | Yes          | 0 | No                          |   |         |
| 1                                                                                                                                                                          | Yes                         |                                                                                                                                                    |                                                                   |                                                                                                                                                                                                                  |   |              |   |                             |   |         |
| 0                                                                                                                                                                          | No                          |                                                                                                                                                    |                                                                   |                                                                                                                                                                                                                  |   |              |   |                             |   |         |
| <br> | 138                         | st_mean1<br>Show the field ONLY if:<br>[st_measure] = '5' or [st_measure] = '6'                                                                    | Mean of intervention/exposure group (type 'NR' if not reported):  | text                                                                                                                                                                                                             |   |              |   |                             |   |         |

|                                                                                                                                                                            |     |                                                                                 |                                                                                                                             |      |
|----------------------------------------------------------------------------------------------------------------------------------------------------------------------------|-----|---------------------------------------------------------------------------------|-----------------------------------------------------------------------------------------------------------------------------|------|
| <br>     | 139 | st_sd1<br>Show the field ONLY if:<br>[st_measure] = '5' or [st_measure] = '6'   | Standard deviation of intervention/exposure group (type 'NR' if not reported):                                              | text |
| <br>     | 140 | st_n1<br>Show the field ONLY if:<br>[st_measure] = '5' or [st_measure] = '6'    | Sample size of intervention/exposure group (type 'NR' if not reported or 'Paired N' if this was a before-after comparison): | text |
| <br>     | 141 | st_mean2<br>Show the field ONLY if:<br>[st_measure] = '5' or [st_measure] = '6' | Mean of comparator group (type 'NR' if not reported):                                                                       | text |
| <br>     | 142 | st_sd2<br>Show the field ONLY if:<br>[st_measure] = '5' or [st_measure] = '6'   | Standard deviation of comparator group (type 'NR' if not reported):                                                         | text |
| <br>    | 143 | st_n2<br>Show the field ONLY if:<br>[st_measure] = '5' or [st_measure] = '6'    | Sample size of comparator group (type 'NR' if not reported or 'Paired N' if this was a before-after comparison):            | text |
| <br> | 144 | st_semean1<br>Show the field ONLY if:<br>[st_meansd] = '0'                      | Standard error of the mean of the intervention/exposure group (type 'NR' if not reported):                                  | text |

|                                                                                                                                                                            |     |                                                             |                                                                                                           |      |
|----------------------------------------------------------------------------------------------------------------------------------------------------------------------------|-----|-------------------------------------------------------------|-----------------------------------------------------------------------------------------------------------|------|
| <br>     | 145 | st_lcimean1<br>Show the field ONLY if:<br>[st_meansd] = '0' | Lower 95% confidence interval of the mean of the intervention/exposure group (type 'NR' if not reported): | text |
| <br>     | 146 | st_ucimean1<br>Show the field ONLY if:<br>[st_meansd] = '0' | Upper 95% confidence interval of the mean of the intervention/exposure group (type 'NR' if not reported): | text |
| <br>     | 147 | st_semean2<br>Show the field ONLY if:<br>[st_meansd] = '0'  | Standard error of the mean of the comparator group (type 'NR' if not reported):                           | text |
| <br>     | 148 | st_lcimean2<br>Show the field ONLY if:<br>[st_meansd] = '0' | Lower 95% confidence interval of the mean of the comparator group (type 'NR' if not reported):            | text |
| <br> | 149 | st_ucimean2<br>Show the field ONLY if:<br>[st_meansd] = '0' | Upper 95% confidence interval of the mean of the comparator group (type 'NR' if not reported):            | text |
| <br> | 150 | st_est<br>Show the field ONLY if:<br>[st_data_avail] = '1'  | Study effect estimate (type 'NR' if not reported):                                                        | text |

|                                                                                                                                                                            |                                                                                                |                                                                  |                                                                                                                                            |                                                                                                                                                                                                                                                                                                                   |       |  |   |                                  |   |                    |   |                                                                                                |
|----------------------------------------------------------------------------------------------------------------------------------------------------------------------------|------------------------------------------------------------------------------------------------|------------------------------------------------------------------|--------------------------------------------------------------------------------------------------------------------------------------------|-------------------------------------------------------------------------------------------------------------------------------------------------------------------------------------------------------------------------------------------------------------------------------------------------------------------|-------|--|---|----------------------------------|---|--------------------|---|------------------------------------------------------------------------------------------------|
| <br>     | 151                                                                                            | st_seest<br>Show the field ONLY if:<br>[st_data_avail] = '1'     | Standard error of the study effect estimate (type 'NR' if not reported):                                                                   | text                                                                                                                                                                                                                                                                                                              |       |  |   |                                  |   |                    |   |                                                                                                |
| <br>     | 152                                                                                            | st_lciest<br>Show the field ONLY if:<br>[st_data_avail] = '1'    | Lower 95% confidence interval of the study effect estimate (type 'NR' if not reported):                                                    | text                                                                                                                                                                                                                                                                                                              |       |  |   |                                  |   |                    |   |                                                                                                |
| <br>     | 153                                                                                            | st_uciest<br>Show the field ONLY if:<br>[st_data_avail] = '1'    | Upper 95% confidence interval of the study effect estimate (type 'NR' if not reported):                                                    | text                                                                                                                                                                                                                                                                                                              |       |  |   |                                  |   |                    |   |                                                                                                |
| <br>     | 154                                                                                            | st_ci_level                                                      | If the confidence interval (CI) was not a 95% CI, specify the CI level (e.g. 90% CI, 99% CI); otherwise leave blank                        | text                                                                                                                                                                                                                                                                                                              |       |  |   |                                  |   |                    |   |                                                                                                |
| <br>    | 155                                                                                            | st_pvalue<br>Show the field ONLY if:<br>[st_data_avail] = '1'    | Specify the exact P-value for the study effect estimate (type 'NR' if not reported):                                                       | text                                                                                                                                                                                                                                                                                                              |       |  |   |                                  |   |                    |   |                                                                                                |
| <br> | 156                                                                                            | st_direction<br>Show the field ONLY if:<br>[st_data_avail] = '1' | Specify the direction of the study effect estimate (note: ignore the statistical significance of the effect, just focus on the direction): | <table border="1"> <tr> <td colspan="2">radio</td> </tr> <tr> <td>1</td> <td>Favours intervention or exposure</td> </tr> <tr> <td>2</td> <td>Favours comparator</td> </tr> <tr> <td>3</td> <td>Neutral (e.g. RR is somewhere between 0.95 and 1.05 or MD is somewhere between -0.05 and 0.05)</td> </tr> </table> | radio |  | 1 | Favours intervention or exposure | 2 | Favours comparator | 3 | Neutral (e.g. RR is somewhere between 0.95 and 1.05 or MD is somewhere between -0.05 and 0.05) |
| radio                                                                                                                                                                      |                                                                                                |                                                                  |                                                                                                                                            |                                                                                                                                                                                                                                                                                                                   |       |  |   |                                  |   |                    |   |                                                                                                |
| 1                                                                                                                                                                          | Favours intervention or exposure                                                               |                                                                  |                                                                                                                                            |                                                                                                                                                                                                                                                                                                                   |       |  |   |                                  |   |                    |   |                                                                                                |
| 2                                                                                                                                                                          | Favours comparator                                                                             |                                                                  |                                                                                                                                            |                                                                                                                                                                                                                                                                                                                   |       |  |   |                                  |   |                    |   |                                                                                                |
| 3                                                                                                                                                                          | Neutral (e.g. RR is somewhere between 0.95 and 1.05 or MD is somewhere between -0.05 and 0.05) |                                                                  |                                                                                                                                            |                                                                                                                                                                                                                                                                                                                   |       |  |   |                                  |   |                    |   |                                                                                                |

|                                                                                                                                                                            |         |                                                                 |                                                                                                                                                                                                                                       |                                                                                                                                                                                |   |     |   |    |   |         |
|----------------------------------------------------------------------------------------------------------------------------------------------------------------------------|---------|-----------------------------------------------------------------|---------------------------------------------------------------------------------------------------------------------------------------------------------------------------------------------------------------------------------------|--------------------------------------------------------------------------------------------------------------------------------------------------------------------------------|---|-----|---|----|---|---------|
|                                                                                                                                                                            |         |                                                                 |                                                                                                                                                                                                                                       | 4 Unclear                                                                                                                                                                      |   |     |   |    |   |         |
| <br>     | 157     | st_location<br>Show the field ONLY if:<br>[st_data_avail] = '1' | Specify the location of the data in the report (e.g. Table 2, Figure 1, text page 378):                                                                                                                                               | text                                                                                                                                                                           |   |     |   |    |   |         |
| <br>     | 158     | incl_ma<br>Show the field ONLY if:<br>[st_data_avail] = '1'     | Does the study effect estimate and 95% CI match the one included in the index meta-analysis? (note: if the study effect estimate and 95% CI were not reported in the study paper, calculate these values from the summary statistics) | radio<br><table border="1" data-bbox="1064 481 1220 646"> <tr> <td>1</td> <td>Yes</td> </tr> <tr> <td>2</td> <td>No</td> </tr> <tr> <td>3</td> <td>Unclear</td> </tr> </table> | 1 | Yes | 2 | No | 3 | Unclear |
| 1                                                                                                                                                                          | Yes     |                                                                 |                                                                                                                                                                                                                                       |                                                                                                                                                                                |   |     |   |    |   |         |
| 2                                                                                                                                                                          | No      |                                                                 |                                                                                                                                                                                                                                       |                                                                                                                                                                                |   |     |   |    |   |         |
| 3                                                                                                                                                                          | Unclear |                                                                 |                                                                                                                                                                                                                                       |                                                                                                                                                                                |   |     |   |    |   |         |
| <br>     | 159     | st_error<br>Show the field ONLY if:<br>[incl_ma] = '1'          | Were the data entered by the systematic reviewers incorrect in any way (e.g. wrong sample size for cross-over trials, or standard error entered as standard deviation)?                                                               | yesno<br><table border="1" data-bbox="1064 904 1169 1016"> <tr> <td>1</td> <td>Yes</td> </tr> <tr> <td>0</td> <td>No</td> </tr> </table>                                       | 1 | Yes | 0 | No |   |         |
| 1                                                                                                                                                                          | Yes     |                                                                 |                                                                                                                                                                                                                                       |                                                                                                                                                                                |   |     |   |    |   |         |
| 0                                                                                                                                                                          | No      |                                                                 |                                                                                                                                                                                                                                       |                                                                                                                                                                                |   |     |   |    |   |         |
| <br> | 160     | st_error_text<br>Show the field ONLY if:<br>[st_error] = '1'    | Describe how the data were entered incorrectly by the systematic reviewers:                                                                                                                                                           | notes                                                                                                                                                                          |   |     |   |    |   |         |
|                                                                                         | 161     | st_notes                                                        | Notes                                                                                                                                                                                                                                 | notes                                                                                                                                                                          |   |     |   |    |   |         |

|                                                                                   |            |                     |                                                 |                                                                                                                                                                                                                                                                                                                                                                                    |   |            |   |            |   |          |
|-----------------------------------------------------------------------------------|------------|---------------------|-------------------------------------------------|------------------------------------------------------------------------------------------------------------------------------------------------------------------------------------------------------------------------------------------------------------------------------------------------------------------------------------------------------------------------------------|---|------------|---|------------|---|----------|
|  |            |                     |                                                 |                                                                                                                                                                                                                                                                                                                                                                                    |   |            |   |            |   |          |
|                                                                                   | 162        | study_data_complete | Section Header: <i>Form Status</i><br>Complete? | dropdown <table border="1" data-bbox="1061 296 1263 462"> <tr> <td data-bbox="1061 296 1099 352">0</td> <td data-bbox="1099 296 1263 352">Incomplete</td> </tr> <tr> <td data-bbox="1061 352 1099 408">1</td> <td data-bbox="1099 352 1263 408">Unverified</td> </tr> <tr> <td data-bbox="1061 408 1099 462">2</td> <td data-bbox="1099 408 1263 462">Complete</td> </tr> </table> | 0 | Incomplete | 1 | Unverified | 2 | Complete |
| 0                                                                                 | Incomplete |                     |                                                 |                                                                                                                                                                                                                                                                                                                                                                                    |   |            |   |            |   |          |
| 1                                                                                 | Unverified |                     |                                                 |                                                                                                                                                                                                                                                                                                                                                                                    |   |            |   |            |   |          |
| 2                                                                                 | Complete   |                     |                                                 |                                                                                                                                                                                                                                                                                                                                                                                    |   |            |   |            |   |          |

**Supplementary Table S3: Content of decision rules reported in systematic review protocols and systematic reviews**

| <b>Type of decision rule</b>                                                                                                                                  | <b>Protocols<br/>(N=14)<br/>n (%)</b> | <b>Systematic<br/>reviews<br/>(N=42)<br/>n (%)</b> |
|---------------------------------------------------------------------------------------------------------------------------------------------------------------|---------------------------------------|----------------------------------------------------|
| Measurement of outcome                                                                                                                                        |                                       |                                                    |
| Not applicable as the index outcome was defined by a particular /definition/criteria                                                                          | 1 (7)                                 | 1 (2)                                              |
| No decision rule                                                                                                                                              | 13 (93)                               | 41 (98)                                            |
| Intervention/exposure and /control groups                                                                                                                     |                                       |                                                    |
| If the same intervention/exposure, but more than one intake level, then select the highest/lowest level                                                       | 1 (7)                                 | 19 (45)                                            |
| If the same intervention/exposure, but with two intake levels, then combine into one group;                                                                   | 1 (7)                                 | 2 (5)                                              |
| If two different interventions/ exposures, include each as separate comparison                                                                                | 1 (7)                                 | 2 (5)                                              |
| *Other                                                                                                                                                        | -                                     | 1 (2)                                              |
| No decision rule                                                                                                                                              | 11 (79)                               | 18 (43)                                            |
| Time points                                                                                                                                                   |                                       |                                                    |
| End of the study                                                                                                                                              | 0                                     | 1 (2)                                              |
| Other specific time point                                                                                                                                     | 0                                     | 2 (5)                                              |
| No decision rule                                                                                                                                              | 14 (100)                              | 39 (93)                                            |
| Final versus change from baseline values                                                                                                                      |                                       |                                                    |
| Final values preferred                                                                                                                                        | 0                                     | 0                                                  |
| Change from baseline values preferred                                                                                                                         | 0                                     | 6 (14)                                             |
| No decision rule                                                                                                                                              | 14 (100)                              | 36 (86)                                            |
| Unadjusted versus covariate adjusted analyses                                                                                                                 |                                       |                                                    |
| Unadjusted analyses preferred to adjusted                                                                                                                     | 0                                     | 1(2)                                               |
| Adjusted analyses preferred to unadjusted                                                                                                                     | 0                                     | 3 (7)                                              |
| Most adjusted analyses preferred if multiple adjusted analyses were reported                                                                                  | 1 (7)                                 | 3 (7)                                              |
| No decision rule                                                                                                                                              | 13 (93)                               | 35 (83)                                            |
| Period or paired analyses in cross-over RCTs                                                                                                                  |                                       |                                                    |
| First period results only                                                                                                                                     | 0                                     | 2 (5)                                              |
| No decision rule                                                                                                                                              | 14 (100)                              | 40 (95)                                            |
| Analyses undertaken on multiple samples                                                                                                                       |                                       |                                                    |
| Intention-to-treat (ITT) analysis preferred                                                                                                                   | 0                                     | 0                                                  |
| Modified ITT analysis preferred (if missing data, modified (last observation carried forward) ITT analysis preferred over per-protocol or as-treated analysis | 0                                     | 0                                                  |
| Per protocol                                                                                                                                                  | 0                                     | 0                                                  |
| As-treated analysis                                                                                                                                           | 0                                     | 0                                                  |
| No decision rule                                                                                                                                              | 14 (100)                              | 42 (100)                                           |

\*Classified based on the authors' description (e.g. when two or more healthy dietary patterns were presented, researchers generally considered a healthy pattern one that mostly included protective foods, such as vegetables, fruits, fish, legumes, whole grains, and low-fat dairy products); ITT: Intention to treat; RCTs: Randomised Controlled Trials



**Supplementary Table S4: Number of systematic reviews that had a discrepancy between the review protocol and review in the eligibility criteria or decision rules to select results (N=14)**

| <b>Type of eligibility criterion and decision rule discrepancy</b>                       | <b>Any<br/>n (%)</b> | <b>Addition<br/>n (%)</b> | <b>Omission<br/>n (%)</b> | <b>Modification<br/>n (%)</b> |
|------------------------------------------------------------------------------------------|----------------------|---------------------------|---------------------------|-------------------------------|
| Total                                                                                    |                      |                           |                           |                               |
| Discrepancy in at least one eligibility criterion                                        | 14 (100)             | 14 (100)                  | 0                         | 0                             |
| Discrepancy in at least one decision rule                                                | 14 (100)             | 13 (93)                   | 0                         | 1 (7)                         |
| Intervention/control groups                                                              |                      |                           |                           |                               |
| Eligibility criteria                                                                     | 1 (7)                | 1 (7)                     | 0                         | 0                             |
| Decision rule                                                                            | 12 (86)              | 11 (79)                   | 0                         | 1 (7)                         |
| Time points                                                                              |                      |                           |                           |                               |
| Eligibility criteria                                                                     | 3 (21)               | 3 (21)                    | 0                         | 0                             |
| Decision rule                                                                            | 2 (14)               | 2 (14)                    | 0                         | 0                             |
| Analyses                                                                                 |                      |                           |                           |                               |
| Eligibility criteria for any type of analysis                                            | 14 (100)             | 14 (100)                  | 0                         | 0                             |
| Decision rule for any type of analysis                                                   | 14 (100)             | 14 (100)                  | 0                         | 0                             |
| Decision rule for analyses undertaken on multiple samples (e.g. ITT versus per-protocol) | 0                    | 0                         | 0                         | 0                             |
| Decision rule for unadjusted versus covariate adjusted analyses                          | 13 (93)              | 13 (93)                   | 0                         | 0                             |
| Decision rule for period versus paired analyses in cross- over RCTs                      | 0                    | 0                         | 0                         | 0                             |
| Other decision rule                                                                      | 0                    | 0                         | 0                         | 0                             |

ITT: Intention to treat; RCTs: Randomised Controlled Trials
